# Supplementary material for: A Novel Serum‐Based Diagnosis of Alzheimer's Disease Using an Advanced Phage‐Based Biochip
Source: PubMed Central journal article supplement (PMC10375152; doi:10.1002/advs.202301650), 2023-05-07
Supplement: ADVS-10-2301650-s001.pdf [file ADVS-10-2301650-s001.pdf]

## Supporting Information

for *Adv. Sci.*, DOI 10.1002/adv.202301650

A Novel Serum-Based Diagnosis of Alzheimer's Disease Using an Advanced Phage-Based Biochip

*Maria Giovanna Rizzo, Laura Maria De Plano, Nicoletta Palermo, Domenico Franco, Marco Nicolò, Emanuele Luigi Sciuto, Giovanna Calabrese, Salvatore Oddo\*, Sabrina Conoci\* and Salvatore P. P. Guglielmino*

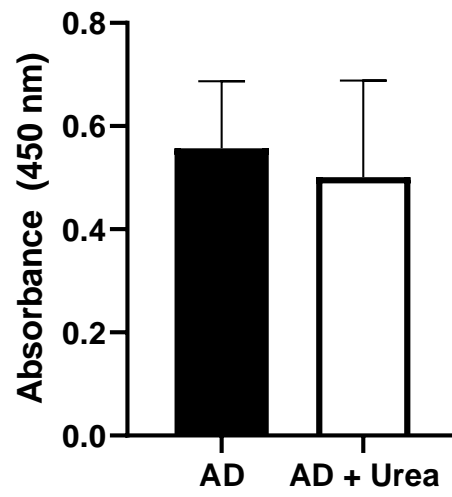

Figure S1. ELISA results for binding affinity of phage 12III1 to the IgG A $\beta$  autoantibodies.

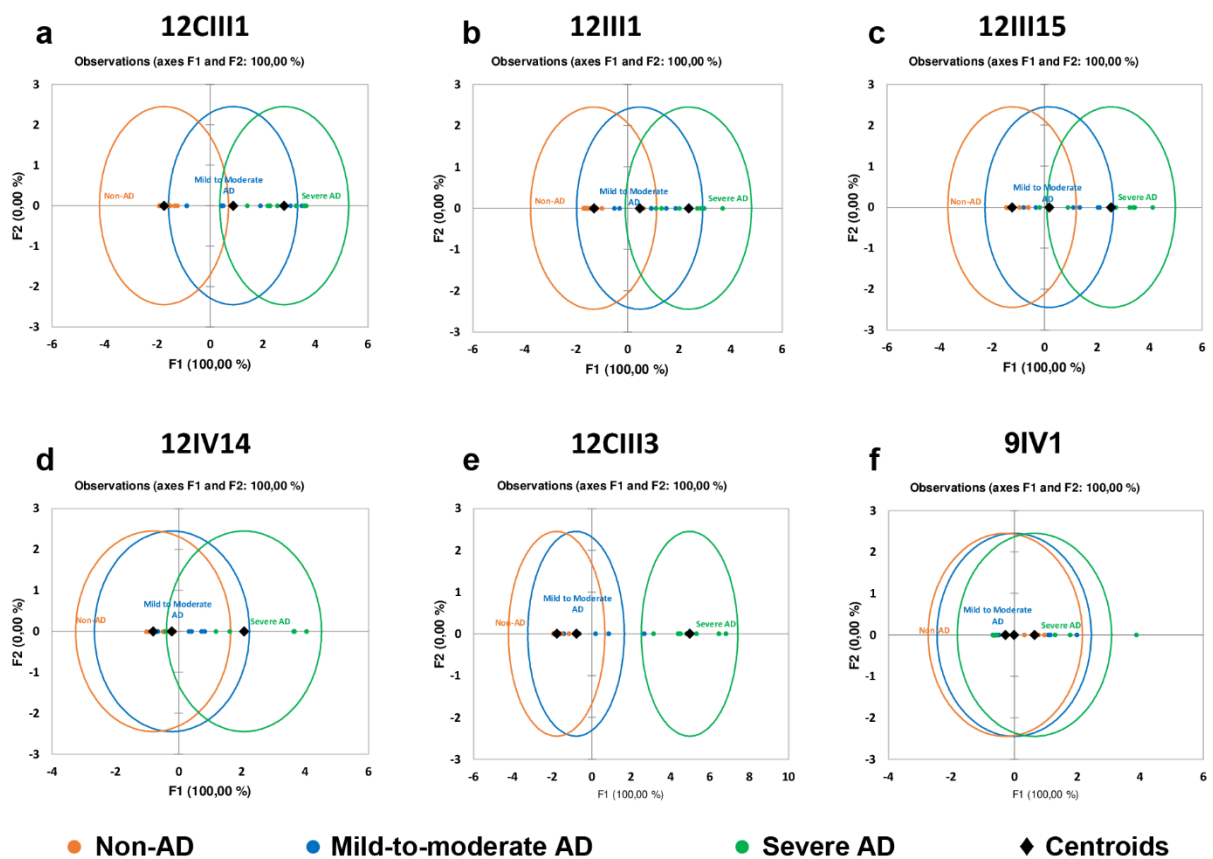

**Figure S2. Discriminant analysis plot on a 1-dimensional map of sera by using a single phage clone.** Orange, blue and green filled circles indicate sera identified as Non-AD, Mild-to-Moderate AD and Severe AD, respectively. The number and percentage of the sera correctly discriminated are summarized in the confusion matrix of Table 3. n=18 for Non-AD, 10 for Mild-to-Moderate AD and 8 for Severe AD.

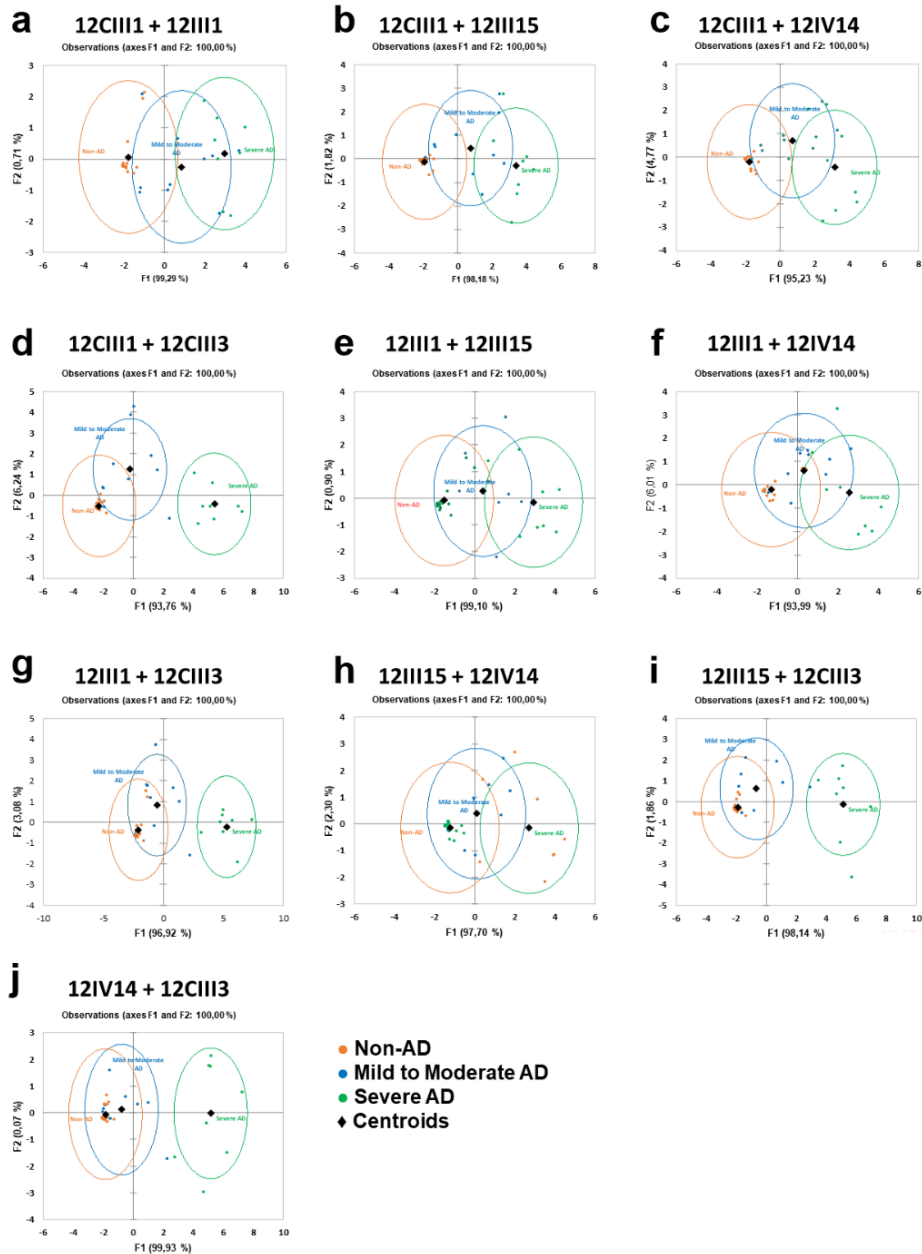

**Figure S3. Discriminant analysis plot on a 2-dimensional map of 36 sera by using pairs of phage clones.** Orange, blue and green filled circles indicate sera identified as Non-AD, Mild-to-Moderate AD and Severe AD, respectively. The number and percentage of the sera correctly discriminated are summarized in the confusion matrix of Table 4. n=18 for Non-AD, 10 for Mild-to-Moderate AD and 8 for Severe AD

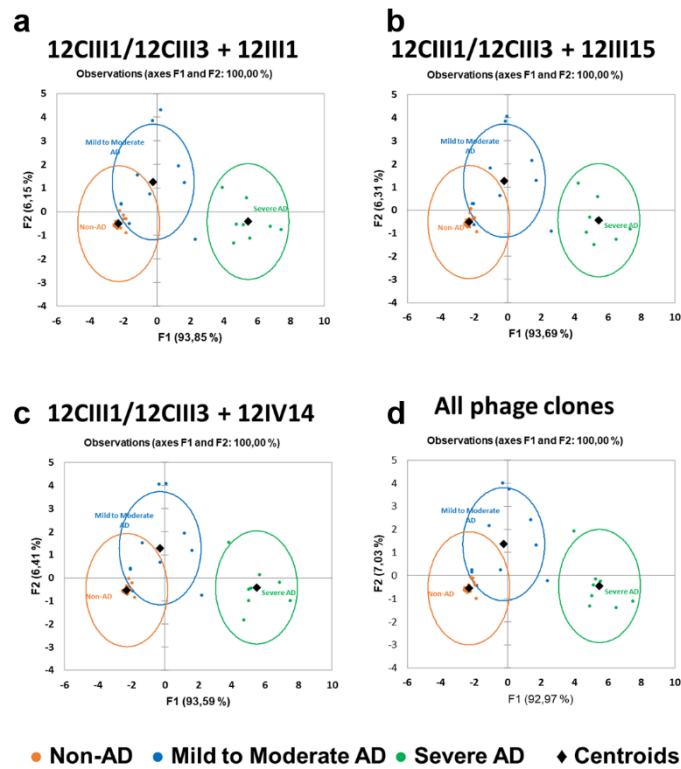

**Figure S4. Discriminant analysis plot on a 2-dimensional map of 36 sera by using three or more clones. (a-c) The panels indicate the analyses done with the pair 12CIII1/12CIII3 and a third phage clone. (d) The panel indicates the analysis done including all phages. Orange, blue and green filled circles indicate sera identified as Non-AD, Mild-to-Moderate AD and Severe AD, respectively. The number and percentage of the sera correctly discriminated are summarized in the confusion matrix of Tables 5-6. n=18 for Non-AD, 10 for Mild-to-Moderate AD and 8 for Severe AD.**



**Table S2.** Demographic characterization of sera

| <b>Clinical Group</b>   | <b>Average age</b> | <b>Average MMSE</b> | <b>Sex</b> |
|-------------------------|--------------------|---------------------|------------|
| <b>Non-AD</b>           | 69                 | 30                  | 55,5 % M   |
| <b>Mild-to-Moderate</b> | 75                 | 19                  | 73 % M     |
| <b>Severe</b>           | 75                 | 9                   | 25 % M     |

**Table S3.** Factor scores for clone 12CIII1. Probability of belonging to Non-AD, Mild-to-Moderate AD, Severe AD groups, and the squared Mahalanobis distances to the centroid of the group of tested 36 sera by using 12CIII1 phage clone. Incorrectly discriminated sera are in bold.

| Sera | Prior               | Posterior                  | Pr(Mild to moderate AD) | Pr(Severe AD) | Pr(Non-AD) | F1     | D <sup>2</sup> (Mild to moderate AD) | D <sup>2</sup> (Severe AD) | D <sup>2</sup> (Non-AD) |
|------|---------------------|----------------------------|-------------------------|---------------|------------|--------|--------------------------------------|----------------------------|-------------------------|
| 1    | Non-AD              | Non-AD                     | 0.025                   | 0.975         | 0.000      | -1.902 | -1.433                               | -8.789                     | 27.551                  |
| 2    | Non-AD              | Non-AD                     | 0.022                   | 0.978         | 0.000      | -1.734 | -1.731                               | -9.322                     | 25.272                  |
| 3    | Non-AD              | Non-AD                     | 0.026                   | 0.974         | 0.000      | -1.925 | -1.391                               | -8.623                     | 27.867                  |
| 4    | Non-AD              | Non-AD                     | 0.022                   | 0.978         | 0.000      | -1.734 | -1.731                               | -9.322                     | 25.272                  |
| 5    | Non-AD              | Non-AD                     | 0.346                   | 0.654         | 0.000      | -1.233 | -2.509                               | -3.781                     | 18.981                  |
| 6    | Non-AD              | Non-AD                     | 0.026                   | 0.974         | 0.000      | -1.927 | -1.388                               | -8.610                     | 27.891                  |
| 7    | Non-AD              | Non-AD                     | 0.026                   | 0.974         | 0.000      | -1.921 | -1.398                               | -8.653                     | 27.814                  |
| 8    | Non-AD              | Non-AD                     | 0.025                   | 0.975         | 0.000      | -1.911 | -1.417                               | -8.729                     | 27.671                  |
| 9    | Non-AD              | Non-AD                     | 0.026                   | 0.974         | 0.000      | -1.916 | -1.408                               | -8.693                     | 27.739                  |
| 10   | Non-AD              | Non-AD                     | 0.023                   | 0.977         | 0.000      | -1.869 | -1.492                               | -8.986                     | 27.103                  |
| 11   | Non-AD              | Non-AD                     | 0.026                   | 0.974         | 0.000      | -1.927 | -1.388                               | -8.609                     | 27.893                  |
| 12   | Non-AD              | Non-AD                     | 0.046                   | 0.954         | 0.000      | -1.512 | -2.096                               | -8.182                     | 22.394                  |
| 13   | Non-AD              | Non-AD                     | 0.046                   | 0.954         | 0.000      | -1.512 | -2.096                               | -8.182                     | 22.394                  |
| 14   | Non-AD              | Non-AD                     | 0.154                   | 0.846         | 0.000      | -1.335 | -2.364                               | -5.767                     | 20.198                  |
| 15   | Non-AD              | Non-AD                     | 0.022                   | 0.978         | 0.000      | -1.740 | -1.720                               | -9.324                     | 25.361                  |
| 16   | Non-AD              | Non-AD                     | 0.021                   | 0.979         | 0.000      | -1.782 | -1.648                               | -9.293                     | 25.914                  |
| 17   | Non-AD              | Non-AD                     | 0.028                   | 0.972         | 0.000      | -1.626 | -1.913                               | -9.030                     | 23.855                  |
| 18   | Non-AD              | Non-AD                     | 0.023                   | 0.977         | 0.000      | -1.878 | -1.476                               | -8.937                     | 27.224                  |
| 19   | Mild to Moderate AD | Mild to Moderate AD        | 0.992                   | 0.008         | 0.000      | -0.877 | -2.962                               | 6.677                      | 14.945                  |
| 20   | Mild to Moderate AD | Mild to Moderate AD        | 0.971                   | 0.000         | 0.029      | 0.464  | -3.920                               | 94.457                     | 3.092                   |
| 21   | Mild to Moderate AD | Mild to Moderate AD        | 0.992                   | 0.008         | 0.000      | -0.877 | -2.962                               | 6.677                      | 14.945                  |
| 22   | Mild to Moderate AD | <b>Severe AD</b>           | 0.220                   | 0.000         | 0.780      | 3.066  | -2.408                               | 483.199                    | -4.935                  |
| 23   | Mild to Moderate AD | <b>Severe AD</b>           | 0.212                   | 0.000         | 0.788      | 3.491  | -1.739                               | 574.063                    | -4.369                  |
| 24   | Mild to Moderate AD | <b>Severe AD</b>           | 0.474                   | 0.000         | 0.526      | 1.919  | -3.623                               | 276.212                    | -3.831                  |
| 25   | Mild to Moderate AD | <b>Non-AD</b>              | 0.031                   | 0.969         | 0.000      | -1.593 | -1.966                               | -8.844                     | 23.434                  |
| 26   | Mild to Moderate AD | Mild to Moderate AD        | 0.967                   | 0.000         | 0.033      | 0.505  | -3.930                               | 98.288                     | 2.816                   |
| 27   | Mild to Moderate AD | Mild to Moderate AD        | 0.973                   | 0.000         | 0.027      | 0.440  | -3.913                               | 92.206                     | 3.258                   |
| 28   | Mild to Moderate AD | <b>Severe AD</b>           | 0.350                   | 0.000         | 0.650      | 2.271  | -3.342                               | 333.787                    | -4.579                  |
| 29   | Severe AD           | Severe AD                  | 0.216                   | 0.000         | 0.784      | 3.615  | -1.522                               | 601.971                    | -4.105                  |
| 30   | Severe AD           | Severe AD                  | 0.214                   | 0.000         | 0.786      | 3.570  | -1.602                               | 591.731                    | -4.206                  |
| 31   | Severe AD           | Severe AD                  | 0.218                   | 0.000         | 0.782      | 3.660  | -1.440                               | 612.381                    | -3.997                  |
| 32   | Severe AD           | Severe AD                  | 0.212                   | 0.000         | 0.788      | 3.264  | -2.111                               | 524.622                    | -4.737                  |
| 33   | Severe AD           | Severe AD                  | 0.371                   | 0.000         | 0.629      | 2.203  | -3.403                               | 322.251                    | -4.462                  |
| 34   | Severe AD           | Severe AD                  | 0.281                   | 0.000         | 0.719      | 2.565  | -3.046                               | 385.843                    | -4.925                  |
| 35   | Severe AD           | <b>Mild to Moderate AD</b> | 0.704                   | 0.000         | 0.296      | 1.419  | -3.881                               | 203.679                    | -2.151                  |
| 36   | Severe AD           | Severe AD                  | 0.347                   | 0.000         | 0.653      | 2.280  | -3.333                               | 335.418                    | -4.594                  |



**Table S4.** Factor scores for clone 12III1. Probability of belonging to Non-AD, Mild-to-Moderate AD and Severe AD groups, and the squared Mahalanobis distances to the centroid of the group of tested 36 sera. Incorrectly discriminated sera are in bold.

| Sera | Prior               | Posterior                  | Pr(Mild to moderate AD) | Pr(Severe AD) | Pr(Non-AD) | F1     | D <sup>2</sup> (Mild to moderate AD) | D <sup>2</sup> (Severe AD) | D <sup>2</sup> (Non-AD) |
|------|---------------------|----------------------------|-------------------------|---------------|------------|--------|--------------------------------------|----------------------------|-------------------------|
| 1    | Non-AD              | Non-AD                     | 0.093                   | 0.907         | 0.000      | -1.704 | -2.113                               | -6.661                     | 17.056                  |
| 2    | Non-AD              | Non-AD                     | 0.095                   | 0.905         | 0.000      | -1.616 | -2.287                               | -6.784                     | 16.115                  |
| 3    | Non-AD              | Non-AD                     | 0.095                   | 0.905         | 0.000      | -1.650 | -2.221                               | -6.741                     | 16.475                  |
| 4    | Non-AD              | Non-AD                     | 0.101                   | 0.899         | 0.000      | -1.489 | -2.527                               | -6.908                     | 14.792                  |
| 5    | Non-AD              | Non-AD                     | 0.123                   | 0.877         | 0.000      | -1.202 | -3.013                               | -6.944                     | 11.963                  |
| 6    | Non-AD              | Non-AD                     | 0.095                   | 0.905         | 0.000      | -1.638 | -2.244                               | -6.756                     | 16.350                  |
| 7    | Non-AD              | Non-AD                     | 0.094                   | 0.906         | 0.000      | -1.660 | -2.201                               | -6.726                     | 16.584                  |
| 8    | Non-AD              | Non-AD                     | 0.094                   | 0.906         | 0.000      | -1.687 | -2.147                               | -6.687                     | 16.872                  |
| 9    | Non-AD              | Non-AD                     | 0.093                   | 0.907         | 0.000      | -1.706 | -2.110                               | -6.658                     | 17.072                  |
| 10   | Non-AD              | Non-AD                     | 0.094                   | 0.906         | 0.000      | -1.684 | -2.154                               | -6.693                     | 16.833                  |
| 11   | Non-AD              | Non-AD                     | 0.093                   | 0.907         | 0.000      | -1.706 | -2.109                               | -6.658                     | 17.075                  |
| 12   | Non-AD              | <b>Mild to Moderate AD</b> | 0.791                   | 0.066         | 0.143      | 0.621  | -4.309                               | 0.644                      | -0.886                  |
| 13   | Non-AD              | <b>Mild to Moderate AD</b> | 0.784                   | 0.122         | 0.094      | 0.456  | -4.319                               | -0.600                     | -0.085                  |
| 14   | Non-AD              | Non-AD                     | 0.103                   | 0.897         | 0.000      | -1.440 | -2.616                               | -6.938                     | 14.292                  |
| 15   | Non-AD              | Non-AD                     | 0.097                   | 0.903         | 0.000      | -1.575 | -2.367                               | -6.832                     | 15.682                  |
| 16   | Non-AD              | Non-AD                     | 0.109                   | 0.891         | 0.000      | -1.348 | -2.775                               | -6.967                     | 13.378                  |
| 17   | Non-AD              | Non-AD                     | 0.095                   | 0.905         | 0.000      | -1.629 | -2.263                               | -6.769                     | 16.247                  |
| 18   | Non-AD              | Non-AD                     | 0.150                   | 0.850         | 0.000      | -1.003 | -3.304                               | -6.773                     | 10.137                  |
| 19   | Mild to Moderate AD | <b>Non-AD</b>              | 0.101                   | 0.899         | 0.000      | -1.489 | -2.527                               | -6.908                     | 14.792                  |
| 20   | Mild to Moderate AD | Mild to Moderate AD        | 0.728                   | 0.019         | 0.253      | 0.910  | -4.230                               | 3.089                      | -2.114                  |
| 21   | Mild to Moderate AD | <b>Non-AD</b>              | 0.095                   | 0.905         | 0.000      | -1.616 | -2.287                               | -6.784                     | 16.115                  |
| 22   | Mild to Moderate AD | Mild to Moderate AD        | 0.728                   | 0.019         | 0.253      | 0.910  | -4.230                               | 3.089                      | -2.114                  |
| 23   | Mild to Moderate AD | <b>Severe AD</b>           | 0.182                   | 0.000         | 0.818      | 2.967  | -1.431                               | 30.277                     | -4.441                  |
| 24   | Mild to Moderate AD | <b>Severe AD</b>           | 0.488                   | 0.001         | 0.511      | 1.499  | -3.831                               | 9.111                      | -3.926                  |
| 25   | Mild to Moderate AD | Mild to Moderate AD        | 0.791                   | 0.094         | 0.115      | 0.530  | -4.317                               | -0.055                     | -0.454                  |
| 26   | Mild to Moderate AD | <b>Non-AD</b>              | 0.387                   | 0.608         | 0.005      | -0.314 | -4.030                               | -4.936                     | 4.604                   |
| 27   | Mild to Moderate AD | <b>Non-AD</b>              | 0.291                   | 0.707         | 0.002      | -0.508 | -3.870                               | -5.648                     | 6.034                   |
| 28   | Mild to Moderate AD | <b>Severe AD</b>           | 0.361                   | 0.000         | 0.639      | 1.854  | -3.434                               | 13.428                     | -4.575                  |
| 29   | Severe AD           | Severe AD                  | 0.177                   | 0.000         | 0.823      | 3.692  | 0.494                                | 43.962                     | -2.584                  |
| 30   | Severe AD           | Severe AD                  | 0.182                   | 0.000         | 0.818      | 2.955  | -1.459                               | 30.063                     | -4.460                  |
| 31   | Severe AD           | <b>Mild to Moderate AD</b> | 0.564                   | 0.002         | 0.434      | 1.317  | -3.989                               | 7.103                      | -3.465                  |
| 32   | Severe AD           | <b>Mild to Moderate AD</b> | 0.655                   | 0.007         | 0.337      | 1.103  | -4.135                               | 4.904                      | -2.808                  |
| 33   | Severe AD           | Severe AD                  | 0.189                   | 0.000         | 0.811      | 2.842  | -1.713                               | 28.133                     | -4.620                  |
| 34   | Severe AD           | Severe AD                  | 0.317                   | 0.000         | 0.683      | 2.011  | -3.222                               | 15.497                     | -4.755                  |
| 35   | Severe AD           | Severe AD                  | 0.201                   | 0.000         | 0.799      | 2.706  | -2.004                               | 25.872                     | -4.768                  |
| 36   | Severe AD           | Severe AD                  | 0.256                   | 0.000         | 0.744      | 2.294  | -2.779                               | 19.490                     | -4.915                  |

**Table S5.** Factor scores for clone 12III15. Probability to belong to Non-AD, Mild-to-Moderate AD and Severe AD groups, and the squared Mahalanobis distances to the centroid of the group of tested 36 sera. Incorrectly discriminated sera are in bold.

| Sera | Prior               | Posterior                  | Pr(Mild to moderate AD) | Pr(Severe AD) | Pr(Non-AD) | F1     | D <sup>2</sup> (Mild to moderate AD) | D <sup>2</sup> (Severe AD) | D <sup>2</sup> (Non-AD) |
|------|---------------------|----------------------------|-------------------------|---------------|------------|--------|--------------------------------------|----------------------------|-------------------------|
| 1    | Non-AD              | Non-AD                     | 0.057                   | 0.941         | 0.002      | -1.233 | -3.358                               | -8.966                     | 2.895                   |
| 2    | Non-AD              | Non-AD                     | 0.057                   | 0.941         | 0.002      | -1.233 | -3.358                               | -8.966                     | 2.895                   |
| 3    | Non-AD              | Non-AD                     | 0.066                   | 0.931         | 0.002      | -1.437 | -3.034                               | -8.321                     | 3.644                   |
| 4    | Non-AD              | Non-AD                     | 0.058                   | 0.939         | 0.002      | -1.357 | -3.165                               | -8.724                     | 3.347                   |
| 5    | Non-AD              | Non-AD                     | 0.116                   | 0.877         | 0.007      | -0.953 | -3.734                               | -7.772                     | 1.929                   |
| 6    | Non-AD              | Non-AD                     | 0.064                   | 0.934         | 0.002      | -1.417 | -3.067                               | -8.440                     | 3.569                   |
| 7    | Non-AD              | Non-AD                     | 0.066                   | 0.932         | 0.002      | -1.434 | -3.039                               | -8.341                     | 3.632                   |
| 8    | Non-AD              | Non-AD                     | 0.067                   | 0.930         | 0.002      | -1.444 | -3.021                               | -8.272                     | 3.673                   |
| 9    | Non-AD              | Non-AD                     | 0.060                   | 0.938         | 0.002      | -1.381 | -3.127                               | -8.626                     | 3.434                   |
| 10   | Non-AD              | Non-AD                     | 0.063                   | 0.934         | 0.002      | -1.415 | -3.070                               | -8.450                     | 3.563                   |
| 11   | Non-AD              | Non-AD                     | 0.064                   | 0.933         | 0.002      | -1.422 | -3.059                               | -8.413                     | 3.587                   |
| 12   | Non-AD              | <b>Mild to Moderate AD</b> | 0.600                   | 0.348         | 0.051      | -0.609 | -4.083                               | -2.994                     | 0.842                   |
| 13   | Non-AD              | Non-AD                     | 0.061                   | 0.936         | 0.003      | -1.171 | -3.448                               | -8.910                     | 2.676                   |
| 14   | Non-AD              | Non-AD                     | 0.058                   | 0.940         | 0.003      | -1.218 | -3.381                               | -8.963                     | 2.839                   |
| 15   | Non-AD              | Non-AD                     | 0.056                   | 0.941         | 0.002      | -1.312 | -3.238                               | -8.867                     | 3.181                   |
| 16   | Non-AD              | <b>Mild to Moderate AD</b> | 0.548                   | 0.407         | 0.045      | -0.634 | -4.062                               | -3.469                     | 0.918                   |
| 17   | Non-AD              | Non-AD                     | 0.057                   | 0.940         | 0.003      | -1.223 | -3.373                               | -8.965                     | 2.860                   |
| 18   | Non-AD              | Non-AD                     | 0.056                   | 0.942         | 0.002      | -1.281 | -3.286                               | -8.929                     | 3.068                   |
| 19   | Mild to Moderate AD | <b>Non-AD</b>              | 0.058                   | 0.939         | 0.002      | -1.357 | -3.165                               | -8.724                     | 3.347                   |
| 20   | Mild to Moderate AD | Mild to Moderate AD        | 0.631                   | 0.000         | 0.369      | 1.107  | -3.967                               | 75.098                     | -2.890                  |
| 21   | Mild to Moderate AD | <b>Non-AD</b>              | 0.057                   | 0.941         | 0.002      | -1.233 | -3.358                               | -8.966                     | 2.895                   |
| 22   | Mild to Moderate AD | Mild to Moderate AD        | 0.820                   | 0.000         | 0.180      | 0.250  | -4.411                               | 24.774                     | -1.374                  |
| 23   | Mild to Moderate AD | Mild to Moderate AD        | 0.882                   | 0.016         | 0.103      | -0.321 | -4.279                               | 3.794                      | 0.021                   |
| 24   | Mild to Moderate AD | Mild to Moderate AD        | 0.563                   | 0.000         | 0.437      | 1.350  | -3.700                               | 93.501                     | -3.193                  |
| 25   | Mild to Moderate AD | <b>Non-AD</b>              | 0.056                   | 0.941         | 0.002      | -1.306 | -3.247                               | -8.881                     | 3.159                   |
| 26   | Mild to Moderate AD | <b>Severe AD</b>           | 0.343                   | 0.000         | 0.657      | 2.104  | -2.479                               | 162.071                    | -3.776                  |
| 27   | Mild to Moderate AD | <b>Non-AD</b>              | 0.264                   | 0.718         | 0.019      | -0.787 | -3.918                               | -5.921                     | 1.390                   |
| 28   | Mild to Moderate AD | <b>Severe AD</b>           | 0.361                   | 0.000         | 0.639      | 2.039  | -2.609                               | 155.430                    | -3.746                  |
| 29   | Severe AD           | Severe AD                  | 0.096                   | 0.000         | 0.904      | 3.383  | 0.957                                | 318.361                    | -3.530                  |
| 30   | Severe AD           | Severe AD                  | 0.196                   | 0.000         | 0.804      | 2.724  | -1.028                               | 231.569                    | -3.850                  |
| 31   | Severe AD           | <b>Mild to Moderate AD</b> | 0.879                   | 0.002         | 0.119      | -0.183 | -4.343                               | 7.953                      | -0.345                  |
| 32   | Severe AD           | Severe AD                  | 0.203                   | 0.000         | 0.797      | 2.690  | -1.117                               | 227.465                    | -3.856                  |
| 33   | Severe AD           | <b>Mild to Moderate AD</b> | 0.688                   | 0.000         | 0.312      | 0.889  | -4.153                               | 60.166                     | -2.571                  |
| 34   | Severe AD           | Severe AD                  | 0.111                   | 0.000         | 0.889      | 3.252  | 0.528                                | 300.101                    | -3.626                  |
| 35   | Severe AD           | Severe AD                  | 0.039                   | 0.000         | 0.961      | 4.124  | 3.731                                | 431.825                    | -2.678                  |
| 36   | Severe AD           | Severe AD                  | 0.089                   | 0.000         | 0.911      | 3.450  | 1.183                                | 327.855                    | -3.475                  |

**Table S6.** Factor scores for clone 12IV14. Probability of belonging to Non-AD, Mild-to-Moderate AD and Severe AD groups, and the squared Mahalanobis distances to the centroid of the group of tested 36 sera by using 12IV14 phage clone. Incorrectly discriminated sera are in bold.

| Sera | Prior               | Posterior                  | Pr(Mild to moderate AD) | Pr(Severe AD) | Pr(Non-AD) | F1     | D <sup>2</sup> (Mild to moderate AD) | D <sup>2</sup> (Severe AD) | D <sup>2</sup> (Non-AD) |
|------|---------------------|----------------------------|-------------------------|---------------|------------|--------|--------------------------------------|----------------------------|-------------------------|
| 1    | Non-AD              | Non-AD                     | 0.134                   | 0.844         | 0.022      | -1.025 | -4.319                               | -7.991                     | -0.681                  |
| 2    | Non-AD              | Non-AD                     | 0.132                   | 0.848         | 0.021      | -0.987 | -4.442                               | -8.165                     | -0.742                  |
| 3    | Non-AD              | Non-AD                     | 0.133                   | 0.846         | 0.021      | -1.003 | -4.391                               | -8.097                     | -0.717                  |
| 4    | Non-AD              | Non-AD                     | 0.268                   | 0.696         | 0.036      | -0.484 | -5.507                               | -7.412                     | -1.473                  |
| 5    | Non-AD              | Non-AD                     | 0.268                   | 0.696         | 0.036      | -0.484 | -5.507                               | -7.412                     | -1.473                  |
| 6    | Non-AD              | Non-AD                     | 0.134                   | 0.845         | 0.022      | -1.017 | -4.344                               | -8.030                     | -0.694                  |
| 7    | Non-AD              | Non-AD                     | 0.133                   | 0.846         | 0.021      | -1.007 | -4.377                               | -8.076                     | -0.710                  |
| 8    | Non-AD              | Non-AD                     | 0.134                   | 0.844         | 0.022      | -1.020 | -4.335                               | -8.016                     | -0.689                  |
| 9    | Non-AD              | Non-AD                     | 0.134                   | 0.845         | 0.021      | -1.014 | -4.356                               | -8.046                     | -0.699                  |
| 10   | Non-AD              | Non-AD                     | 0.133                   | 0.845         | 0.021      | -1.011 | -4.364                               | -8.058                     | -0.703                  |
| 11   | Non-AD              | Non-AD                     | 0.133                   | 0.845         | 0.021      | -1.013 | -4.359                               | -8.050                     | -0.701                  |
| 12   | Non-AD              | <b>Mild to Moderate AD</b> | 0.674                   | 0.222         | 0.105      | -0.124 | -5.643                               | -3.418                     | -1.916                  |
| 13   | Non-AD              | <b>Mild to Moderate AD</b> | 0.468                   | 0.466         | 0.066      | -0.291 | -5.645                               | -5.637                     | -1.718                  |
| 14   | Non-AD              | Non-AD                     | 0.132                   | 0.847         | 0.021      | -0.990 | -4.430                               | -8.150                     | -0.737                  |
| 15   | Non-AD              | Non-AD                     | 0.149                   | 0.831         | 0.020      | -0.749 | -5.071                               | -8.510                     | -1.103                  |
| 16   | Non-AD              | Non-AD                     | 0.331                   | 0.624         | 0.045      | -0.412 | -5.576                               | -6.844                     | -1.567                  |
| 17   | Non-AD              | Non-AD                     | 0.130                   | 0.850         | 0.020      | -0.925 | -4.626                               | -8.373                     | -0.838                  |
| 18   | Non-AD              | Non-AD                     | 0.131                   | 0.849         | 0.019      | -0.892 | -4.721                               | -8.453                     | -0.890                  |
| 19   | Mild to Moderate AD | <b>Non-AD</b>              | 0.141                   | 0.839         | 0.020      | -0.791 | -4.978                               | -8.539                     | -1.043                  |
| 20   | Mild to Moderate AD | <b>Non-AD</b>              | 0.268                   | 0.696         | 0.036      | -0.484 | -5.507                               | -7.412                     | -1.473                  |
| 21   | Mild to Moderate AD | <b>Non-AD</b>              | 0.133                   | 0.846         | 0.021      | -1.003 | -4.391                               | -8.097                     | -0.717                  |
| 22   | Mild to Moderate AD | <b>Non-AD</b>              | 0.171                   | 0.806         | 0.023      | -0.668 | -5.235                               | -8.339                     | -1.221                  |
| 23   | Mild to Moderate AD | Mild to Moderate AD        | 0.587                   | 0.000         | 0.413      | 0.833  | -3.468                               | 21.179                     | -2.766                  |
| 24   | Mild to Moderate AD | Mild to Moderate AD        | 0.643                   | 0.000         | 0.357      | 0.731  | -3.876                               | 17.587                     | -2.698                  |
| 25   | Mild to Moderate AD | <b>Non-AD</b>              | 0.138                   | 0.843         | 0.019      | -0.815 | -4.920                               | -8.539                     | -1.007                  |
| 26   | Mild to Moderate AD | <b>Non-AD</b>              | 0.177                   | 0.799         | 0.024      | -0.649 | -5.269                               | -8.280                     | -1.247                  |
| 27   | Mild to Moderate AD | Mild to Moderate AD        | 0.790                   | 0.003         | 0.207      | 0.334  | -5.062                               | 5.813                      | -2.382                  |
| 28   | Mild to Moderate AD | Mild to Moderate AD        | 0.769                   | 0.001         | 0.229      | 0.414  | -4.874                               | 7.912                      | -2.453                  |
| 29   | Severe AD           | Severe AD                  | 0.000                   | 0.000         | 1.000      | 3.645  | 24.268                               | 211.182                    | -2.517                  |
| 30   | Severe AD           | Severe AD                  | 0.000                   | 0.000         | 1.000      | 4.042  | 30.749                               | 252.149                    | -2.152                  |
| 31   | Severe AD           | Severe AD                  | 0.357                   | 0.000         | 0.643      | 1.178  | -1.779                               | 35.038                     | -2.956                  |
| 32   | Severe AD           | <b>Non-AD</b>              | 0.325                   | 0.631         | 0.044      | -0.418 | -5.570                               | -6.899                     | -1.559                  |
| 33   | Severe AD           | <b>Non-AD</b>              | 0.136                   | 0.845         | 0.019      | -0.831 | -4.881                               | -8.532                     | -0.983                  |
| 34   | Severe AD           | Severe AD                  | 0.110                   | 0.000         | 0.890      | 1.618  | 1.071                                | 56.550                     | -3.109                  |
| 35   | Severe AD           | Severe AD                  | 0.000                   | 0.000         | 1.000      | 3.655  | 24.433                               | 212.229                    | -2.508                  |
| 36   | Severe AD           | Severe AD                  | 0.000                   | 0.000         | 1.000      | 3.655  | 24.433                               | 212.229                    | -2.508                  |

**Table S7.** Factor scores for clone 12CIII3. Probability to belonging to Non-AD, Mild-to-Moderate AD and Severe AD groups, and the squared Mahalanobis distances to the centroid of the group of tested 36 sera. Incorrectly discriminated sera are in bold.

| Sera | Prior               | Posterior                  | Pr(Mild to moderate AD) | Pr(Severe AD) | Pr(Non-AD) | F1     | D <sup>2</sup> (Mild to moderate AD) | D <sup>2</sup> (Severe AD) | D <sup>2</sup> (Non-AD) |
|------|---------------------|----------------------------|-------------------------|---------------|------------|--------|--------------------------------------|----------------------------|-------------------------|
| 1    | Non-AD              | Non-AD                     | 0.070                   | 0.930         | 0.000      | -1.939 | -4.589                               | -9.753                     | 28.321                  |
| 2    | Non-AD              | Non-AD                     | 0.055                   | 0.945         | 0.000      | -1.746 | -4.753                               | -10.454                    | 26.471                  |
| 3    | Non-AD              | Non-AD                     | 0.063                   | 0.937         | 0.000      | -1.905 | -4.620                               | -10.018                    | 27.993                  |
| 4    | Non-AD              | Non-AD                     | 0.071                   | 0.929         | 0.000      | -1.941 | -4.587                               | -9.738                     | 28.337                  |
| 5    | Non-AD              | Non-AD                     | 0.071                   | 0.929         | 0.000      | -1.941 | -4.587                               | -9.738                     | 28.337                  |
| 6    | Non-AD              | Non-AD                     | 0.055                   | 0.945         | 0.000      | -1.832 | -4.683                               | -10.384                    | 27.289                  |
| 7    | Non-AD              | Non-AD                     | 0.056                   | 0.944         | 0.000      | -1.853 | -4.666                               | -10.309                    | 27.487                  |
| 8    | Non-AD              | Non-AD                     | 0.057                   | 0.943         | 0.000      | -1.714 | -4.776                               | -10.382                    | 26.176                  |
| 9    | Non-AD              | Non-AD                     | 0.054                   | 0.946         | 0.000      | -1.819 | -4.695                               | -10.421                    | 27.160                  |
| 10   | Non-AD              | Non-AD                     | 0.057                   | 0.943         | 0.000      | -1.864 | -4.656                               | -10.260                    | 27.594                  |
| 11   | Non-AD              | Non-AD                     | 0.067                   | 0.933         | 0.000      | -1.927 | -4.600                               | -9.856                     | 28.202                  |
| 12   | Non-AD              | Non-AD                     | 0.063                   | 0.937         | 0.000      | -1.905 | -4.620                               | -10.022                    | 27.987                  |
| 13   | Non-AD              | Non-AD                     | 0.068                   | 0.932         | 0.000      | -1.646 | -4.825                               | -10.047                    | 25.537                  |
| 14   | Non-AD              | Non-AD                     | 0.107                   | 0.893         | 0.000      | -1.547 | -4.890                               | -9.123                     | 24.622                  |
| 15   | Non-AD              | <b>Mild to Moderate AD</b> | 0.917                   | 0.083         | 0.000      | -1.150 | -5.068                               | -0.269                     | 21.102                  |
| 16   | Non-AD              | Non-AD                     | 0.054                   | 0.946         | 0.000      | -1.761 | -4.741                               | -10.470                    | 26.613                  |
| 17   | Non-AD              | Non-AD                     | 0.054                   | 0.946         | 0.000      | -1.815 | -4.697                               | -10.429                    | 27.127                  |
| 18   | Non-AD              | Non-AD                     | 0.075                   | 0.925         | 0.000      | -1.620 | -4.843                               | -9.855                     | 25.295                  |
| 19   | Mild to Moderate AD | <b>Non-AD</b>              | 0.070                   | 0.930         | 0.000      | -1.937 | -4.591                               | -9.775                     | 28.296                  |
| 20   | Mild to Moderate AD | <b>Non-AD</b>              | 0.056                   | 0.944         | 0.000      | -1.856 | -4.663                               | -10.294                    | 27.522                  |
| 21   | Mild to Moderate AD | <b>Non-AD</b>              | 0.063                   | 0.937         | 0.000      | -1.905 | -4.620                               | -10.018                    | 27.993                  |
| 22   | Mild to Moderate AD | <b>Non-AD</b>              | 0.071                   | 0.929         | 0.000      | -1.944 | -4.585                               | -9.714                     | 28.364                  |
| 23   | Mild to Moderate AD | <b>Non-AD</b>              | 0.067                   | 0.933         | 0.000      | -1.927 | -4.600                               | -9.855                     | 28.203                  |
| 24   | Mild to Moderate AD | Mild to Moderate AD        | 0.995                   | 0.000         | 0.005      | 0.861  | -4.023                               | 171.749                    | 6.655                   |
| 25   | Mild to Moderate AD | <b>Non-AD</b>              | 0.263                   | 0.737         | 0.000      | -1.411 | -4.965                               | -7.030                     | 23.396                  |
| 26   | Mild to Moderate AD | <b>Severe AD</b>           | 0.358                   | 0.000         | 0.642      | 2.666  | -0.315                               | 506.814                    | -1.480                  |
| 27   | Mild to Moderate AD | Mild to Moderate AD        | 1.000                   | 0.000         | 0.000      | -0.642 | -5.111                               | 23.127                     | 16.918                  |
| 28   | Mild to Moderate AD | Mild to Moderate AD        | 1.000                   | 0.000         | 0.000      | 0.195  | -4.729                               | 91.287                     | 10.809                  |
| 29   | Severe AD           | Severe AD                  | 0.000                   | 0.000         | 1.000      | 6.807  | 18.100                               | 1921.920                   | -2.885                  |
| 30   | Severe AD           | Severe AD                  | 0.004                   | 0.000         | 0.996      | 4.426  | 5.827                                | 998.356                    | -5.015                  |
| 31   | Severe AD           | Severe AD                  | 0.000                   | 0.000         | 1.000      | 6.458  | 16.015                               | 1767.883                   | -3.695                  |
| 32   | Severe AD           | Severe AD                  | 0.126                   | 0.000         | 0.874      | 3.127  | 1.055                                | 619.997                    | -2.828                  |
| 33   | Severe AD           | Severe AD                  | 0.001                   | 0.000         | 0.999      | 5.312  | 9.863                                | 1307.422                   | -5.151                  |
| 34   | Severe AD           | Severe AD                  | 0.002                   | 0.000         | 0.998      | 4.815  | 7.520                                | 1128.877                   | -5.211                  |
| 35   | Severe AD           | Severe AD                  | 0.004                   | 0.000         | 0.996      | 4.493  | 6.108                                | 1020.150                   | -5.064                  |
| 36   | Severe AD           | Severe AD                  | 0.005                   | 0.000         | 0.995      | 4.389  | 5.670                                | 986.235                    | -4.986                  |

**Table S8.** Factor scores for clone 9IV1. Probability of belonging to Non-AD, Mild-to-Moderate AD and Severe AD groups, and the squared Mahalanobis distances to the centroid of the group of tested 36 sera. Incorrectly discriminated sera are in bold.

| Sera | Prior               | Posterior                  | Pr(Mild to moderate AD) | Pr(Severe AD) | Pr(Non-AD) | F1     | D <sup>2</sup> (Mild to moderate AD) | D <sup>2</sup> (Severe AD) | D <sup>2</sup> (Non-AD) |
|------|---------------------|----------------------------|-------------------------|---------------|------------|--------|--------------------------------------|----------------------------|-------------------------|
| 1    | Non-AD              | Non-AD                     | 0.218                   | 0.685         | 0.097      | -0.675 | -8.044                               | -10.337                    | -6.424                  |
| 2    | Non-AD              | Non-AD                     | 0.231                   | 0.664         | 0.105      | -0.024 | -8.497                               | -10.606                    | -6.910                  |
| 3    | Non-AD              | Non-AD                     | 0.231                   | 0.664         | 0.105      | -0.024 | -8.497                               | -10.606                    | -6.910                  |
| 4    | Non-AD              | Non-AD                     | 0.216                   | 0.688         | 0.096      | -0.650 | -8.077                               | -10.396                    | -6.448                  |
| 5    | Non-AD              | Non-AD                     | 0.217                   | 0.686         | 0.097      | -0.668 | -8.054                               | -10.354                    | -6.431                  |
| 6    | Non-AD              | Non-AD                     | 0.215                   | 0.689         | 0.095      | -0.644 | -8.086                               | -10.411                    | -6.455                  |
| 7    | Non-AD              | Non-AD                     | 0.214                   | 0.692         | 0.094      | -0.615 | -8.122                               | -10.474                    | -6.483                  |
| 8    | Non-AD              | Non-AD                     | 0.211                   | 0.696         | 0.093      | -0.575 | -8.169                               | -10.552                    | -6.520                  |
| 9    | Non-AD              | Non-AD                     | 0.216                   | 0.688         | 0.096      | -0.658 | -8.067                               | -10.378                    | -6.441                  |
| 10   | Non-AD              | Non-AD                     | 0.217                   | 0.687         | 0.096      | -0.659 | -8.065                               | -10.375                    | -6.440                  |
| 11   | Non-AD              | Non-AD                     | 0.215                   | 0.691         | 0.095      | -0.632 | -8.101                               | -10.437                    | -6.466                  |
| 12   | Non-AD              | Non-AD                     | 0.213                   | 0.693         | 0.094      | -0.604 | -8.135                               | -10.496                    | -6.493                  |
| 13   | Non-AD              | Non-AD                     | 0.215                   | 0.690         | 0.095      | -0.635 | -8.097                               | -10.430                    | -6.463                  |
| 14   | Non-AD              | <b>Mild to Moderate AD</b> | 0.415                   | 0.312         | 0.274      | 0.770  | -7.902                               | -7.331                     | -7.071                  |
| 15   | Non-AD              | Non-AD                     | 0.217                   | 0.686         | 0.096      | -0.666 | -8.056                               | -10.358                    | -6.433                  |
| 16   | Non-AD              | Non-AD                     | 0.293                   | 0.558         | 0.149      | 0.319  | -8.394                               | -9.678                     | -7.038                  |
| 17   | Non-AD              | <b>Mild to Moderate AD</b> | 0.452                   | 0.203         | 0.345      | 0.958  | -7.577                               | -5.979                     | -7.039                  |
| 18   | Non-AD              | Non-AD                     | 0.361                   | 0.429         | 0.209      | 0.573  | -8.167                               | -8.513                     | -7.075                  |
| 19   | Mild to Moderate AD | <b>Non-AD</b>              | 0.218                   | 0.685         | 0.097      | -0.675 | -8.045                               | -10.338                    | -6.424                  |
| 20   | Mild to Moderate AD | <b>Non-AD</b>              | 0.210                   | 0.698         | 0.092      | -0.548 | -8.200                               | -10.599                    | -6.544                  |
| 21   | Mild to Moderate AD | <b>Non-AD</b>              | 0.208                   | 0.701         | 0.091      | -0.483 | -8.266                               | -10.693                    | -6.600                  |
| 22   | Mild to Moderate AD | <b>Non-AD</b>              | 0.217                   | 0.686         | 0.097      | -0.670 | -8.051                               | -10.348                    | -6.429                  |
| 23   | Mild to Moderate AD | <b>Non-AD</b>              | 0.216                   | 0.688         | 0.096      | -0.650 | -8.077                               | -10.396                    | -6.448                  |
| 24   | Mild to Moderate AD | Mild to Moderate AD        | 0.464                   | 0.118         | 0.418      | 1.141  | -7.194                               | -4.453                     | -6.983                  |
| 25   | Mild to Moderate AD | <b>Severe AD</b>           | 0.284                   | 0.002         | 0.714      | 1.987  | -4.547                               | 5.359                      | -6.394                  |
| 26   | Mild to Moderate AD | Mild to Moderate AD        | 0.463                   | 0.142         | 0.395      | 1.082  | -7.323                               | -4.963                     | -7.004                  |
| 27   | Mild to Moderate AD | <b>Non-AD</b>              | 0.210                   | 0.699         | 0.092      | -0.536 | -8.212                               | -10.618                    | -6.555                  |
| 28   | Mild to Moderate AD | <b>Non-AD</b>              | 0.217                   | 0.686         | 0.096      | -0.666 | -8.057                               | -10.359                    | -6.433                  |
| 29   | Severe AD           | <b>Non-AD</b>              | 0.210                   | 0.698         | 0.092      | -0.551 | -8.196                               | -10.594                    | -6.541                  |
| 30   | Severe AD           | <b>Non-AD</b>              | 0.218                   | 0.685         | 0.097      | -0.675 | -8.044                               | -10.336                    | -6.424                  |
| 31   | Severe AD           | <b>Non-AD</b>              | 0.216                   | 0.689         | 0.095      | -0.644 | -8.085                               | -10.410                    | -6.454                  |
| 32   | Severe AD           | <b>Non-AD</b>              | 0.213                   | 0.694         | 0.093      | -0.598 | -8.142                               | -10.507                    | -6.498                  |
| 33   | Severe AD           | <b>Non-AD</b>              | 0.380                   | 0.390         | 0.230      | 0.641  | -8.085                               | -8.135                     | -7.077                  |
| 34   | Severe AD           | Severe AD                  | 0.455                   | 0.067         | 0.478      | 1.295  | -6.819                               | -3.002                     | -6.916                  |
| 35   | Severe AD           | Severe AD                  | 0.345                   | 0.007         | 0.648      | 1.779  | -5.331                               | 2.529                      | -6.589                  |
| 36   | Severe AD           | Severe AD                  | 0.008                   | 0.000         | 0.992      | 3.882  | 6.560                                | 43.601                     | -3.117                  |

**Table S9.** Factor scores for clones 12CIII1 and 12III1. Probability to belonging to Non-AD, Mild-to-Moderate AD and Severe AD groups, and the squared Mahalanobis distances to the centroid of the group of tested 36 sera. Incorrectly discriminated sera are in bold.

| Sera | Prior               | Posterior           | Pr(Mild to moderate AD) | Pr(Severe AD) | Pr(Non-AD) | F1     | F2     | D <sup>2</sup> (Mild to moderate AD) | D <sup>2</sup> (Severe AD) | D <sup>2</sup> (Non-AD) |
|------|---------------------|---------------------|-------------------------|---------------|------------|--------|--------|--------------------------------------|----------------------------|-------------------------|
| 1    | Non-AD              | Non-AD              | 0.016                   | 0.984         | 0.000      | -2.034 | -0.248 | -9.104                               | -17.372                    | 48.675                  |
| 2    | Non-AD              | Non-AD              | 0.016                   | 0.984         | 0.000      | -1.874 | -0.299 | -9.383                               | -17.686                    | 45.054                  |
| 3    | Non-AD              | Non-AD              | 0.017                   | 0.983         | 0.000      | -2.035 | -0.163 | -9.115                               | -17.251                    | 48.353                  |
| 4    | Non-AD              | Non-AD              | 0.015                   | 0.985         | 0.000      | -1.834 | -0.150 | -9.477                               | -17.859                    | 43.521                  |
| 5    | Non-AD              | Non-AD              | 0.393                   | 0.607         | 0.000      | -1.349 | -0.274 | -10.229                              | -11.097                    | 33.254                  |
| 6    | Non-AD              | Non-AD              | 0.017                   | 0.983         | 0.000      | -2.033 | -0.148 | -9.120                               | -17.241                    | 48.234                  |
| 7    | Non-AD              | Non-AD              | 0.017                   | 0.983         | 0.000      | -2.035 | -0.179 | -9.113                               | -17.276                    | 48.420                  |
| 8    | Non-AD              | Non-AD              | 0.016                   | 0.984         | 0.000      | -2.036 | -0.220 | -9.107                               | -17.332                    | 48.596                  |
| 9    | Non-AD              | Non-AD              | 0.016                   | 0.984         | 0.000      | -2.045 | -0.237 | -9.086                               | -17.290                    | 48.901                  |
| 10   | Non-AD              | Non-AD              | 0.015                   | 0.985         | 0.000      | -2.002 | -0.254 | -9.163                               | -17.544                    | 47.919                  |
| 11   | Non-AD              | Non-AD              | 0.017                   | 0.983         | 0.000      | -2.054 | -0.227 | -9.071                               | -17.216                    | 49.077                  |
| 12   | Non-AD              | Non-AD              | 0.129                   | 0.871         | 0.000      | -1.001 | 2.118  | -6.415                               | -10.233                    | 21.411                  |
| 13   | Non-AD              | Non-AD              | 0.096                   | 0.904         | 0.000      | -1.053 | 1.924  | -7.057                               | -11.548                    | 22.459                  |
| 14   | Non-AD              | Non-AD              | 0.194                   | 0.806         | 0.000      | -1.503 | -0.460 | -9.931                               | -12.781                    | 37.295                  |
| 15   | Non-AD              | Non-AD              | 0.015                   | 0.985         | 0.000      | -1.866 | -0.245 | -9.410                               | -17.768                    | 44.651                  |
| 16   | Non-AD              | Non-AD              | 0.014                   | 0.986         | 0.000      | -1.828 | 0.059  | -9.461                               | -17.924                    | 42.585                  |
| 17   | Non-AD              | Non-AD              | 0.023                   | 0.977         | 0.000      | -1.792 | -0.413 | -9.482                               | -16.988                    | 43.626                  |
| 18   | Non-AD              | Non-AD              | 0.021                   | 0.979         | 0.000      | -1.797 | 0.551  | -9.165                               | -16.829                    | 40.212                  |
| 19   | Mild to Moderate AD | Mild to Moderate AD | 0.999                   | 0.001         | 0.000      | -1.157 | -0.939 | -10.001                              | 4.543                      | 31.962                  |
| 20   | Mild to Moderate AD | Mild to Moderate AD | 0.994                   | 0.000         | 0.006      | 0.651  | 0.640  | -11.141                              | 90.321                     | -0.763                  |
| 21   | Mild to Moderate AD | Mild to Moderate AD | 1.000                   | 0.000         | 0.000      | -1.196 | -1.088 | -9.736                               | 5.649                      | 33.459                  |
| 22   | Mild to Moderate AD | <b>Severe AD</b>    | 0.366                   | 0.000         | 0.634      | 2.706  | -1.753 | -9.046                               | 554.027                    | -10.148                 |
| 23   | Mild to Moderate AD | <b>Severe AD</b>    | 0.194                   | 0.000         | 0.806      | 3.683  | 0.266  | -8.834                               | 609.722                    | -11.683                 |
| 24   | Mild to Moderate AD | Mild to Moderate AD | 0.600                   | 0.000         | 0.400      | 1.983  | -0.008 | -11.302                              | 292.124                    | -10.490                 |
| 25   | Mild to Moderate AD | <b>Non-AD</b>       | 0.113                   | 0.887         | 0.000      | -1.094 | 2.086  | -6.437                               | -10.564                    | 23.083                  |
| 26   | Mild to Moderate AD | Mild to Moderate AD | 1.000                   | 0.000         | 0.000      | 0.301  | -0.832 | -11.401                              | 107.561                    | 6.684                   |
| 27   | Mild to Moderate AD | Mild to Moderate AD | 1.000                   | 0.000         | 0.000      | 0.189  | -1.000 | -11.161                              | 102.766                    | 8.791                   |
| 28   | Mild to Moderate AD | <b>Severe AD</b>    | 0.358                   | 0.000         | 0.642      | 2.372  | 0.084  | -10.901                              | 353.163                    | -12.072                 |
| 29   | Severe AD           | Severe AD           | 0.232                   | 0.000         | 0.768      | 4.007  | 1.002  | -6.929                               | 626.870                    | -9.319                  |
| 30   | Severe AD           | Severe AD           | 0.205                   | 0.000         | 0.795      | 3.741  | 0.179  | -8.811                               | 630.444                    | -11.525                 |
| 31   | Severe AD           | Severe AD           | 0.212                   | 0.000         | 0.788      | 3.303  | -1.822 | -8.118                               | 699.768                    | -10.738                 |
| 32   | Severe AD           | Severe AD           | 0.287                   | 0.000         | 0.713      | 2.923  | -1.710 | -8.892                               | 599.099                    | -10.717                 |
| 33   | Severe AD           | Severe AD           | 0.139                   | 0.000         | 0.861      | 2.626  | 1.304  | -8.546                               | 325.842                    | -12.189                 |
| 34   | Severe AD           | Severe AD           | 0.266                   | 0.000         | 0.734      | 2.653  | -0.002 | -10.643                              | 410.880                    | -12.669                 |
| 35   | Severe AD           | Severe AD           | 0.219                   | 0.000         | 0.781      | 1.965  | 1.865  | -7.508                               | 197.848                    | -10.056                 |
| 36   | Severe AD           | Severe AD           | 0.238                   | 0.000         | 0.762      | 2.517  | 0.591  | -10.186                              | 347.911                    | -12.512                 |

**Table S10.** Factor scores for clones 12CIII1 and 12III15. Probability to belonging to Non-AD, Mild-to-Moderate AD and Severe AD groups, and the squared Mahalanobis distances to the centroid of the group of tested 36 sera. Incorrectly discriminated sera are in bold.

| Sera | Prior               | Posterior                  | Pr(Mild to moderate AD) | Pr(Severe AD) | Pr(Non-AD) | F1     | F2     | D <sup>2</sup> (Mild to moderate AD) | D <sup>2</sup> (Severe AD) | D <sup>2</sup> (Non-AD) |
|------|---------------------|----------------------------|-------------------------|---------------|------------|--------|--------|--------------------------------------|----------------------------|-------------------------|
| 1    | Non-AD              | Non-AD                     | 0.005                   | 0.995         | 0.000      | -2.047 | -0.237 | -8.624                               | -19.275                    | 48.027                  |
| 2    | Non-AD              | Non-AD                     | 0.004                   | 0.996         | 0.000      | -1.921 | -0.118 | -8.890                               | -20.031                    | 44.851                  |
| 3    | Non-AD              | Non-AD                     | 0.005                   | 0.995         | 0.000      | -2.167 | -0.070 | -8.469                               | -19.165                    | 50.091                  |
| 4    | Non-AD              | Non-AD                     | 0.004                   | 0.996         | 0.000      | -1.984 | -0.006 | -8.812                               | -19.650                    | 45.818                  |
| 5    | Non-AD              | Non-AD                     | 0.086                   | 0.914         | 0.000      | -1.405 | -0.016 | -9.707                               | -14.434                    | 33.967                  |
| 6    | Non-AD              | Non-AD                     | 0.005                   | 0.995         | 0.000      | -2.158 | -0.090 | -8.480                               | -19.223                    | 49.963                  |
| 7    | Non-AD              | Non-AD                     | 0.005                   | 0.995         | 0.000      | -2.162 | -0.071 | -8.477                               | -19.197                    | 49.989                  |
| 8    | Non-AD              | Non-AD                     | 0.005                   | 0.995         | 0.000      | -2.160 | -0.053 | -8.485                               | -19.199                    | 49.877                  |
| 9    | Non-AD              | Non-AD                     | 0.004                   | 0.996         | 0.000      | -2.132 | -0.114 | -8.522                               | -19.373                    | 49.458                  |
| 10   | Non-AD              | Non-AD                     | 0.004                   | 0.996         | 0.000      | -2.114 | -0.051 | -8.570                               | -19.468                    | 48.846                  |
| 11   | Non-AD              | Non-AD                     | 0.005                   | 0.995         | 0.000      | -2.161 | -0.085 | -8.477                               | -19.207                    | 50.004                  |
| 12   | Non-AD              | Non-AD                     | 0.091                   | 0.909         | 0.000      | -1.440 | -0.523 | -9.342                               | -13.956                    | 36.313                  |
| 13   | Non-AD              | Non-AD                     | 0.009                   | 0.991         | 0.000      | -1.724 | -0.017 | -9.240                               | -18.718                    | 40.347                  |
| 14   | Non-AD              | Non-AD                     | 0.055                   | 0.945         | 0.000      | -1.614 | 0.150  | -9.432                               | -15.106                    | 37.592                  |
| 15   | Non-AD              | Non-AD                     | 0.004                   | 0.996         | 0.000      | -1.966 | -0.052 | -8.833                               | -19.885                    | 45.587                  |
| 16   | Non-AD              | Non-AD                     | 0.214                   | 0.786         | 0.000      | -1.655 | -0.691 | -8.872                               | -11.475                    | 41.297                  |
| 17   | Non-AD              | Non-AD                     | 0.005                   | 0.995         | 0.000      | -1.835 | -0.051 | -9.053                               | -19.640                    | 42.791                  |
| 18   | Non-AD              | Non-AD                     | 0.004                   | 0.996         | 0.000      | -2.053 | -0.177 | -8.640                               | -19.616                    | 47.948                  |
| 19   | Mild to Moderate AD | Mild to Moderate AD        | 1.000                   | 0.000         | 0.000      | -1.341 | 0.601  | -9.721                               | 6.300                      | 31.069                  |
| 20   | Mild to Moderate AD | Mild to Moderate AD        | 0.997                   | 0.000         | 0.003      | 0.906  | -0.667 | -10.356                              | 102.067                    | 1.258                   |
| 21   | Mild to Moderate AD | Mild to Moderate AD        | 0.998                   | 0.002         | 0.000      | -1.278 | 0.489  | -9.858                               | 2.897                      | 30.184                  |
| 22   | Mild to Moderate AD | <b>Severe AD</b>           | 0.472                   | 0.000         | 0.528      | 2.424  | 1.946  | -9.226                               | 530.558                    | -9.448                  |
| 23   | Mild to Moderate AD | <b>Severe AD</b>           | 0.399                   | 0.000         | 0.601      | 2.455  | 2.761  | -7.352                               | 697.509                    | -8.173                  |
| 24   | Mild to Moderate AD | Mild to Moderate AD        | 0.674                   | 0.000         | 0.326      | 2.118  | 0.144  | -10.485                              | 266.534                    | -9.037                  |
| 25   | Mild to Moderate AD | <b>Non-AD</b>              | 0.007                   | 0.993         | 0.000      | -1.852 | 0.047  | -9.044                               | -18.910                    | 42.833                  |
| 26   | Mild to Moderate AD | Mild to Moderate AD        | 0.958                   | 0.000         | 0.042      | 1.438  | -1.536 | -8.201                               | 165.625                    | -1.930                  |
| 27   | Mild to Moderate AD | Mild to Moderate AD        | 1.000                   | 0.000         | 0.000      | -0.066 | 1.020  | -10.730                              | 101.993                    | 9.990                   |
| 28   | Mild to Moderate AD | <b>Severe AD</b>           | 0.292                   | 0.000         | 0.708      | 2.729  | -0.226 | -9.413                               | 333.175                    | -11.185                 |
| 29   | Severe AD           | Severe AD                  | 0.099                   | 0.000         | 0.901      | 4.414  | -0.484 | -5.645                               | 620.547                    | -10.071                 |
| 30   | Severe AD           | Severe AD                  | 0.140                   | 0.000         | 0.860      | 4.048  | 0.077  | -7.337                               | 587.064                    | -10.976                 |
| 31   | Severe AD           | Severe AD                  | 0.349                   | 0.000         | 0.651      | 2.652  | 2.756  | -7.202                               | 732.724                    | -8.448                  |
| 32   | Severe AD           | Severe AD                  | 0.119                   | 0.000         | 0.881      | 3.802  | -0.109 | -7.661                               | 524.308                    | -11.662                 |
| 33   | Severe AD           | <b>Mild to Moderate AD</b> | 0.685                   | 0.000         | 0.315      | 2.099  | 0.760  | -10.641                              | 315.571                    | -9.088                  |
| 34   | Severe AD           | Severe AD                  | 0.059                   | 0.000         | 0.941      | 3.561  | -1.110 | -6.270                               | 438.817                    | -11.805                 |
| 35   | Severe AD           | Severe AD                  | 0.023                   | 0.000         | 0.977      | 3.141  | -2.705 | -1.434                               | 434.269                    | -8.974                  |
| 36   | Severe AD           | Severe AD                  | 0.047                   | 0.000         | 0.953      | 3.447  | -1.489 | -5.451                               | 420.067                    | -11.472                 |

**Table S11.** Factor scores for clones 12CIII1 and 12IV14. Probability to belonging to Non-AD, Mild-to-Moderate AD and Severe AD groups, and the squared Mahalanobis distances to the centroid of the group of tested 36 sera. Incorrectly discriminated sera are in bold.

| Sera | Prior               | Posterior                  | Pr(Mild to moderate AD) | Pr(Severe AD) | Pr(Non-AD) | F1     | F2     | D <sup>2</sup> (Mild to moderate AD) | D <sup>2</sup> (Severe AD) | D <sup>2</sup> (Non-AD) |
|------|---------------------|----------------------------|-------------------------|---------------|------------|--------|--------|--------------------------------------|----------------------------|-------------------------|
| 1    | Non-AD              | Non-AD                     | 0.013                   | 0.987         | 0.000      | -1.990 | -0.064 | -10.261                              | -18.954                    | 24.352                  |
| 2    | Non-AD              | Non-AD                     | 0.014                   | 0.986         | 0.000      | -1.832 | -0.008 | -10.556                              | -19.038                    | 21.988                  |
| 3    | Non-AD              | Non-AD                     | 0.013                   | 0.987         | 0.000      | -2.003 | -0.099 | -10.228                              | -18.891                    | 24.631                  |
| 4    | Non-AD              | Non-AD                     | 0.016                   | 0.984         | 0.000      | -1.663 | -0.497 | -9.836                               | -18.049                    | 21.183                  |
| 5    | Non-AD              | Non-AD                     | 0.183                   | 0.817         | 0.000      | -1.230 | -0.218 | -10.998                              | -13.985                    | 14.847                  |
| 6    | Non-AD              | Non-AD                     | 0.013                   | 0.987         | 0.000      | -2.009 | -0.086 | -10.221                              | -18.850                    | 24.681                  |
| 7    | Non-AD              | Non-AD                     | 0.013                   | 0.987         | 0.000      | -2.001 | -0.092 | -10.234                              | -18.905                    | 24.585                  |
| 8    | Non-AD              | Non-AD                     | 0.013                   | 0.987         | 0.000      | -1.996 | -0.074 | -10.248                              | -18.929                    | 24.464                  |
| 9    | Non-AD              | Non-AD                     | 0.013                   | 0.987         | 0.000      | -1.998 | -0.083 | -10.242                              | -18.921                    | 24.520                  |
| 10   | Non-AD              | Non-AD                     | 0.012                   | 0.988         | 0.000      | -1.957 | -0.060 | -10.323                              | -19.111                    | 23.876                  |
| 11   | Non-AD              | Non-AD                     | 0.013                   | 0.987         | 0.000      | -2.008 | -0.090 | -10.222                              | -18.859                    | 24.675                  |
| 12   | Non-AD              | Non-AD                     | 0.058                   | 0.942         | 0.000      | -1.350 | -0.724 | -8.875                               | -14.449                    | 17.791                  |
| 13   | Non-AD              | Non-AD                     | 0.029                   | 0.971         | 0.000      | -1.406 | -0.561 | -9.701                               | -16.726                    | 18.013                  |
| 14   | Non-AD              | Non-AD                     | 0.412                   | 0.588         | 0.000      | -1.488 | 0.218  | -11.091                              | -11.800                    | 16.877                  |
| 15   | Non-AD              | Non-AD                     | 0.010                   | 0.990         | 0.000      | -1.758 | -0.242 | -10.439                              | -19.602                    | 21.681                  |
| 16   | Non-AD              | Non-AD                     | 0.026                   | 0.974         | 0.000      | -1.680 | -0.594 | -9.444                               | -16.695                    | 21.724                  |
| 17   | Non-AD              | Non-AD                     | 0.019                   | 0.981         | 0.000      | -1.718 | -0.007 | -10.748                              | -18.585                    | 20.454                  |
| 18   | Non-AD              | Non-AD                     | 0.011                   | 0.989         | 0.000      | -1.925 | -0.181 | -10.294                              | -19.253                    | 23.793                  |
| 19   | Mild to Moderate AD | Mild to Moderate AD        | 1.000                   | 0.000         | 0.000      | -1.024 | 0.280  | -11.764                              | 3.796                      | 11.246                  |
| 20   | Mild to Moderate AD | Mild to Moderate AD        | 0.997                   | 0.000         | 0.003      | 0.239  | 0.730  | -12.662                              | 117.522                    | -1.192                  |
| 21   | Mild to Moderate AD | Mild to Moderate AD        | 1.000                   | 0.000         | 0.000      | -1.096 | 0.486  | -11.439                              | 9.230                      | 11.597                  |
| 22   | Mild to Moderate AD | <b>Severe AD</b>           | 0.257                   | 0.000         | 0.743      | 2.428  | 2.362  | -7.065                               | 693.664                    | -9.185                  |
| 23   | Mild to Moderate AD | Mild to Moderate AD        | 0.501                   | 0.000         | 0.499      | 3.300  | 1.138  | -10.178                              | 666.358                    | -10.169                 |
| 24   | Mild to Moderate AD | Mild to Moderate AD        | 0.663                   | 0.000         | 0.337      | 1.906  | 0.360  | -10.852                              | 296.222                    | -9.498                  |
| 25   | Mild to Moderate AD | <b>Non-AD</b>              | 0.017                   | 0.983         | 0.000      | -1.653 | -0.097 | -10.784                              | -18.884                    | 19.846                  |
| 26   | Mild to Moderate AD | Mild to Moderate AD        | 0.996                   | 0.000         | 0.004      | 0.218  | 0.914  | -12.345                              | 131.248                    | -1.232                  |
| 27   | Mild to Moderate AD | Mild to Moderate AD        | 0.990                   | 0.000         | 0.010      | 0.493  | -0.079 | -11.100                              | 87.562                     | -1.995                  |
| 28   | Mild to Moderate AD | Mild to Moderate AD        | 0.726                   | 0.000         | 0.274      | 2.104  | 0.864  | -11.960                              | 386.198                    | -10.010                 |
| 29   | Severe AD           | Severe AD                  | 0.000                   | 0.000         | 1.000      | 4.353  | -1.529 | 25.681                               | 592.427                    | -9.590                  |
| 30   | Severe AD           | Severe AD                  | 0.000                   | 0.000         | 1.000      | 4.448  | -1.940 | 35.729                               | 588.361                    | -9.318                  |
| 31   | Severe AD           | Severe AD                  | 0.358                   | 0.000         | 0.642      | 3.563  | 0.897  | -8.815                               | 688.032                    | -9.985                  |
| 32   | Severe AD           | Severe AD                  | 0.358                   | 0.000         | 0.642      | 2.683  | 2.229  | -8.170                               | 723.982                    | -9.338                  |
| 33   | Severe AD           | <b>Mild to Moderate AD</b> | 0.529                   | 0.000         | 0.471      | 1.626  | 2.038  | -8.623                               | 474.604                    | -8.395                  |
| 34   | Severe AD           | Severe AD                  | 0.045                   | 0.000         | 0.955      | 2.763  | -0.143 | -4.908                               | 391.345                    | -11.039                 |
| 35   | Severe AD           | Severe AD                  | 0.000                   | 0.000         | 1.000      | 2.458  | -2.765 | 38.948                               | 256.662                    | -7.736                  |
| 36   | Severe AD           | Severe AD                  | 0.000                   | 0.000         | 1.000      | 3.202  | -2.284 | 33.141                               | 352.124                    | -10.138                 |



**Table S12.** Factor scores for clones 12CIII1 and 12CIII3. Probability to belonging to Non-AD, Mild-to-Moderate AD and Severe AD groups, and the squared Mahalanobis distances to the centroid of the group of tested 36 sera. Incorrectly discriminated sera are in bold.

| Sera | Prior               | Posterior           | Pr(Mild to moderate AD) | Pr(Severe AD) | Pr(Non-AD) | F1     | F2     | D <sup>2</sup> (Mild to moderate AD) | D <sup>2</sup> (Severe AD) | D <sup>2</sup> (Non-AD) |
|------|---------------------|---------------------|-------------------------|---------------|------------|--------|--------|--------------------------------------|----------------------------|-------------------------|
| 1    | Non-AD              | Non-AD              | 0.003                   | 0.997         | 0.000      | -2.485 | -0.555 | -8.775                               | -20.088                    | 36.289                  |
| 2    | Non-AD              | Non-AD              | 0.002                   | 0.998         | 0.000      | -2.247 | -0.519 | -9.195                               | -21.180                    | 33.191                  |
| 3    | Non-AD              | Non-AD              | 0.003                   | 0.997         | 0.000      | -2.468 | -0.595 | -8.759                               | -20.174                    | 36.278                  |
| 4    | Non-AD              | Non-AD              | 0.003                   | 0.997         | 0.000      | -2.407 | -0.404 | -9.061                               | -20.441                    | 34.618                  |
| 5    | Non-AD              | Non-AD              | 0.096                   | 0.904         | 0.000      | -2.171 | 0.043  | -9.807                               | -14.283                    | 30.160                  |
| 6    | Non-AD              | Non-AD              | 0.003                   | 0.997         | 0.000      | -2.408 | -0.640 | -8.807                               | -20.450                    | 35.767                  |
| 7    | Non-AD              | Non-AD              | 0.003                   | 0.997         | 0.000      | -2.423 | -0.623 | -8.803                               | -20.439                    | 35.857                  |
| 8    | Non-AD              | Non-AD              | 0.003                   | 0.997         | 0.000      | -2.304 | -0.695 | -8.908                               | -20.440                    | 34.770                  |
| 9    | Non-AD              | Non-AD              | 0.003                   | 0.997         | 0.000      | -2.392 | -0.638 | -8.835                               | -20.554                    | 35.555                  |
| 10   | Non-AD              | Non-AD              | 0.003                   | 0.997         | 0.000      | -2.407 | -0.570 | -8.886                               | -20.711                    | 35.405                  |
| 11   | Non-AD              | Non-AD              | 0.004                   | 0.996         | 0.000      | -2.486 | -0.584 | -8.740                               | -20.021                    | 36.454                  |
| 12   | Non-AD              | Non-AD              | 0.007                   | 0.993         | 0.000      | -2.273 | -0.227 | -9.440                               | -19.391                    | 32.265                  |
| 13   | Non-AD              | Non-AD              | 0.006                   | 0.994         | 0.000      | -2.061 | -0.380 | -9.607                               | -19.790                    | 30.357                  |
| 14   | Non-AD              | Non-AD              | 0.031                   | 0.969         | 0.000      | -1.896 | -0.280 | -9.918                               | -16.788                    | 28.058                  |
| 15   | Non-AD              | Non-AD              | 0.328                   | 0.672         | 0.000      | -1.762 | -0.876 | -9.401                               | -10.834                    | 29.273                  |
| 16   | Non-AD              | Non-AD              | 0.002                   | 0.998         | 0.000      | -2.282 | -0.553 | -9.105                               | -21.162                    | 33.776                  |
| 17   | Non-AD              | Non-AD              | 0.003                   | 0.997         | 0.000      | -2.253 | -0.382 | -9.327                               | -20.825                    | 32.651                  |
| 18   | Non-AD              | Non-AD              | 0.004                   | 0.996         | 0.000      | -2.212 | -0.722 | -9.016                               | -20.049                    | 33.777                  |
| 19   | Mild to Moderate AD | Mild to Moderate AD | 0.969                   | 0.031         | 0.000      | -2.000 | 0.360  | -10.241                              | -3.335                     | 27.450                  |
| 20   | Mild to Moderate AD | Mild to Moderate AD | 1.000                   | 0.000         | 0.000      | -1.303 | 1.510  | -11.177                              | 85.677                     | 20.392                  |
| 21   | Mild to Moderate AD | Mild to Moderate AD | 0.963                   | 0.037         | 0.000      | -1.974 | 0.341  | -10.267                              | -3.751                     | 27.197                  |
| 22   | Mild to Moderate AD | Mild to Moderate AD | 1.000                   | 0.000         | 0.000      | -0.149 | 3.886  | -9.383                               | 485.611                    | 25.735                  |
| 23   | Mild to Moderate AD | Mild to Moderate AD | 1.000                   | 0.000         | 0.000      | 0.064  | 4.255  | -8.695                               | 577.793                    | 28.397                  |
| 24   | Mild to Moderate AD | Mild to Moderate AD | 0.988                   | 0.000         | 0.012      | 1.609  | 1.206  | -10.315                              | 394.405                    | -1.489                  |
| 25   | Mild to Moderate AD | <b>Non-AD</b>       | 0.018                   | 0.982         | 0.000      | -1.907 | -0.591 | -9.583                               | -17.549                    | 29.495                  |
| 26   | Mild to Moderate AD | Mild to Moderate AD | 0.759                   | 0.000         | 0.241      | 2.422  | -1.122 | -6.693                               | 552.167                    | -4.395                  |
| 27   | Mild to Moderate AD | Mild to Moderate AD | 1.000                   | 0.000         | 0.000      | -0.319 | 0.772  | -11.589                              | 100.839                    | 10.722                  |
| 28   | Mild to Moderate AD | Mild to Moderate AD | 0.999                   | 0.000         | 0.001      | 1.229  | 1.913  | -10.722                              | 382.003                    | 3.155                   |
| 29   | Severe AD           | Severe AD           | 0.000                   | 0.000         | 1.000      | 7.279  | -0.787 | 12.866                               | 2279.374                   | -10.804                 |
| 30   | Severe AD           | Severe AD           | 0.002                   | 0.000         | 0.998      | 5.307  | 0.578  | 0.852                                | 1410.870                   | -11.908                 |
| 31   | Severe AD           | Severe AD           | 0.000                   | 0.000         | 1.000      | 7.015  | -0.540 | 10.888                               | 2142.622                   | -11.434                 |
| 32   | Severe AD           | Severe AD           | 0.058                   | 0.000         | 0.942      | 4.099  | 1.071  | -4.167                               | 1010.126                   | -9.740                  |
| 33   | Severe AD           | Severe AD           | 0.000                   | 0.000         | 1.000      | 5.390  | -1.166 | 3.491                                | 1482.153                   | -12.503                 |
| 34   | Severe AD           | Severe AD           | 0.001                   | 0.000         | 0.999      | 5.153  | -0.550 | 1.400                                | 1362.613                   | -13.278                 |
| 35   | Severe AD           | Severe AD           | 0.007                   | 0.000         | 0.993      | 4.350  | -1.383 | -0.438                               | 1120.135                   | -10.478                 |
| 36   | Severe AD           | Severe AD           | 0.002                   | 0.000         | 0.998      | 4.670  | -0.552 | -0.612                               | 1188.610                   | -12.862                 |

**Table S13.** Factor scores for clones 12III1 and 12III15. Probability to belonging to Non-AD, Mild-to-Moderate AD and Severe AD groups, and the squared Mahalanobis distances to the centroid of the group of tested 36 sera. Incorrectly discriminated sera are in bold.

| Sera | Prior               | Posterior                  | Pr(Mild to moderate AD) | Pr(Severe AD) | Pr(Non-AD) | F1     | F2     | D <sup>2</sup> (Mild to moderate AD) | D <sup>2</sup> (Severe AD) | D <sup>2</sup> (Non-AD) |
|------|---------------------|----------------------------|-------------------------|---------------|------------|--------|--------|--------------------------------------|----------------------------|-------------------------|
| 1    | Non-AD              | Non-AD                     | 0.017                   | 0.983         | 0.000      | -1.749 | -0.443 | -9.162                               | -17.292                    | 10.836                  |
| 2    | Non-AD              | Non-AD                     | 0.017                   | 0.983         | 0.000      | -1.697 | -0.362 | -9.311                               | -17.484                    | 9.971                   |
| 3    | Non-AD              | Non-AD                     | 0.018                   | 0.982         | 0.000      | -1.839 | -0.207 | -9.090                               | -17.123                    | 10.604                  |
| 4    | Non-AD              | Non-AD                     | 0.017                   | 0.983         | 0.000      | -1.696 | -0.131 | -9.406                               | -17.523                    | 8.957                   |
| 5    | Non-AD              | Non-AD                     | 0.045                   | 0.955         | 0.000      | -1.283 | -0.236 | -10.102                              | -16.191                    | 5.792                   |
| 6    | Non-AD              | Non-AD                     | 0.017                   | 0.983         | 0.000      | -1.820 | -0.215 | -9.127                               | -17.242                    | 10.459                  |
| 7    | Non-AD              | Non-AD                     | 0.017                   | 0.983         | 0.000      | -1.843 | -0.219 | -9.077                               | -17.143                    | 10.698                  |
| 8    | Non-AD              | Non-AD                     | 0.018                   | 0.982         | 0.000      | -1.866 | -0.234 | -9.024                               | -17.073                    | 10.976                  |
| 9    | Non-AD              | Non-AD                     | 0.015                   | 0.985         | 0.000      | -1.838 | -0.310 | -9.050                               | -17.361                    | 11.059                  |
| 10   | Non-AD              | Non-AD                     | 0.016                   | 0.984         | 0.000      | -1.846 | -0.258 | -9.057                               | -17.238                    | 10.895                  |
| 11   | Non-AD              | Non-AD                     | 0.016                   | 0.984         | 0.000      | -1.863 | -0.272 | -9.014                               | -17.196                    | 11.124                  |
| 12   | Non-AD              | <b>Mild to Moderate AD</b> | 0.683                   | 0.272         | 0.045      | 0.001  | 1.129  | -11.031                              | -9.187                     | -5.588                  |
| 13   | Non-AD              | <b>Mild to Moderate AD</b> | 0.661                   | 0.316         | 0.023      | -0.436 | 1.491  | -10.323                              | -8.844                     | -3.630                  |
| 14   | Non-AD              | Non-AD                     | 0.017                   | 0.983         | 0.000      | -1.583 | -0.214 | -9.596                               | -17.695                    | 8.286                   |
| 15   | Non-AD              | Non-AD                     | 0.016                   | 0.984         | 0.000      | -1.720 | -0.252 | -9.318                               | -17.618                    | 9.691                   |
| 16   | Non-AD              | <b>Mild to Moderate AD</b> | 0.625                   | 0.375         | 0.000      | -1.178 | -0.663 | -9.980                               | -8.958                     | 6.735                   |
| 17   | Non-AD              | Non-AD                     | 0.017                   | 0.983         | 0.000      | -1.698 | -0.382 | -9.298                               | -17.425                    | 10.078                  |
| 18   | Non-AD              | Non-AD                     | 0.027                   | 0.973         | 0.000      | -1.364 | 0.247  | -10.050                              | -17.243                    | 4.705                   |
| 19   | Mild to Moderate AD | <b>Non-AD</b>              | 0.017                   | 0.983         | 0.000      | -1.696 | -0.131 | -9.406                               | -17.523                    | 8.957                   |
| 20   | Mild to Moderate AD | Mild to Moderate AD        | 0.739                   | 0.000         | 0.261      | 1.204  | -0.173 | -11.078                              | 74.811                     | -8.994                  |
| 21   | Mild to Moderate AD | <b>Non-AD</b>              | 0.017                   | 0.983         | 0.000      | -1.697 | -0.362 | -9.311                               | -17.484                    | 9.971                   |
| 22   | Mild to Moderate AD | Mild to Moderate AD        | 0.841                   | 0.000         | 0.159      | 0.688  | 0.611  | -11.427                              | 16.127                     | -8.097                  |
| 23   | Mild to Moderate AD | Mild to Moderate AD        | 0.663                   | 0.000         | 0.337      | 1.559  | 3.028  | -7.006                               | 19.491                     | -5.655                  |
| 24   | Mild to Moderate AD | <b>Severe AD</b>           | 0.495                   | 0.000         | 0.505      | 1.697  | 0.147  | -10.687                              | 91.385                     | -10.724                 |
| 25   | Mild to Moderate AD | Mild to Moderate AD        | 0.879                   | 0.087         | 0.034      | -0.473 | 1.683  | -10.007                              | -5.385                     | -3.477                  |
| 26   | Mild to Moderate AD | Mild to Moderate AD        | 0.959                   | 0.000         | 0.041      | 1.081  | -2.214 | -7.869                               | 217.851                    | -1.556                  |
| 27   | Mild to Moderate AD | <b>Non-AD</b>              | 0.128                   | 0.871         | 0.000      | -0.774 | 0.251  | -10.875                              | -14.708                    | 0.278                   |
| 28   | Mild to Moderate AD | <b>Severe AD</b>           | 0.269                   | 0.000         | 0.731      | 2.322  | -0.156 | -9.583                               | 162.463                    | -11.585                 |
| 29   | Severe AD           | Severe AD                  | 0.072                   | 0.000         | 0.928      | 4.216  | 0.309  | -4.513                               | 331.275                    | -9.612                  |
| 30   | Severe AD           | Severe AD                  | 0.107                   | 0.000         | 0.893      | 3.384  | 0.232  | -7.217                               | 239.049                    | -11.468                 |
| 31   | Severe AD           | <b>Mild to Moderate AD</b> | 0.794                   | 0.001         | 0.205      | 0.668  | 1.381  | -10.845                              | 1.719                      | -8.137                  |
| 32   | Severe AD           | Severe AD                  | 0.342                   | 0.000         | 0.658      | 2.270  | -1.444 | -8.032                               | 271.027                    | -9.341                  |
| 33   | Severe AD           | Severe AD                  | 0.416                   | 0.000         | 0.584      | 2.213  | 1.806  | -8.857                               | 52.723                     | -9.537                  |
| 34   | Severe AD           | Severe AD                  | 0.086                   | 0.000         | 0.914      | 3.145  | -1.121 | -6.582                               | 344.193                    | -11.300                 |
| 35   | Severe AD           | Severe AD                  | 0.024                   | 0.000         | 0.976      | 4.079  | -1.277 | -3.316                               | 496.943                    | -10.761                 |
| 36   | Severe AD           | Severe AD                  | 0.059                   | 0.000         | 0.941      | 3.430  | -1.040 | -5.894                               | 373.040                    | -11.440                 |

**Table S14.** Factor scores for clones 12III1 and 12IV14. Probability to belonging to Non-AD, Mild-to-Moderate AD and Severe AD groups, and the squared Mahalanobis distances to the centroid of the group of tested 36 sera. Incorrectly discriminated sera are in bold.

| Sera | Prior               | Posterior                  | Pr(Mild to moderate AD) | Pr(Severe AD) | Pr(Non-AD) | F1     | F2     | D <sup>2</sup> (Mild to moderate AD) | D <sup>2</sup> (Severe AD) | D <sup>2</sup> (Non-AD) |
|------|---------------------|----------------------------|-------------------------|---------------|------------|--------|--------|--------------------------------------|----------------------------|-------------------------|
| 1    | Non-AD              | Non-AD                     | 0.040                   | 0.960         | 0.000      | -1.696 | -0.277 | -11.041                              | -17.386                    | 11.933                  |
| 2    | Non-AD              | Non-AD                     | 0.040                   | 0.960         | 0.000      | -1.613 | -0.247 | -11.220                              | -17.553                    | 10.893                  |
| 3    | Non-AD              | Non-AD                     | 0.040                   | 0.960         | 0.000      | -1.646 | -0.257 | -11.151                              | -17.486                    | 11.289                  |
| 4    | Non-AD              | Non-AD                     | 0.218                   | 0.782         | 0.000      | -1.346 | -0.694 | -10.796                              | -13.351                    | 10.093                  |
| 5    | Non-AD              | Non-AD                     | 0.126                   | 0.874         | 0.000      | -1.117 | -0.458 | -11.573                              | -15.442                    | 6.725                   |
| 6    | Non-AD              | Non-AD                     | 0.043                   | 0.957         | 0.000      | -1.641 | -0.231 | -11.164                              | -17.392                    | 11.123                  |
| 7    | Non-AD              | Non-AD                     | 0.040                   | 0.960         | 0.000      | -1.655 | -0.261 | -11.130                              | -17.466                    | 11.410                  |
| 8    | Non-AD              | Non-AD                     | 0.040                   | 0.960         | 0.000      | -1.681 | -0.269 | -11.075                              | -17.407                    | 11.727                  |
| 9    | Non-AD              | Non-AD                     | 0.039                   | 0.961         | 0.000      | -1.694 | -0.291 | -11.044                              | -17.445                    | 11.968                  |
| 10   | Non-AD              | Non-AD                     | 0.040                   | 0.960         | 0.000      | -1.675 | -0.275 | -11.086                              | -17.454                    | 11.694                  |
| 11   | Non-AD              | Non-AD                     | 0.039                   | 0.961         | 0.000      | -1.694 | -0.292 | -11.044                              | -17.449                    | 11.973                  |
| 12   | Non-AD              | <b>Mild to Moderate AD</b> | 0.778                   | 0.180         | 0.042      | 0.455  | 0.646  | -13.249                              | -10.322                    | -7.412                  |
| 13   | Non-AD              | <b>Mild to Moderate AD</b> | 0.710                   | 0.265         | 0.026      | 0.268  | 0.695  | -13.241                              | -11.268                    | -6.611                  |
| 14   | Non-AD              | Non-AD                     | 0.053                   | 0.947         | 0.000      | -1.474 | -0.098 | -11.501                              | -17.249                    | 8.779                   |
| 15   | Non-AD              | Non-AD                     | 0.048                   | 0.952         | 0.000      | -1.502 | -0.473 | -11.195                              | -17.159                    | 10.731                  |
| 16   | Non-AD              | Non-AD                     | 0.282                   | 0.718         | 0.000      | -1.210 | -0.657 | -10.962                              | -12.830                    | 8.515                   |
| 17   | Non-AD              | Non-AD                     | 0.037                   | 0.963         | 0.000      | -1.603 | -0.324 | -11.208                              | -17.733                    | 11.133                  |
| 18   | Non-AD              | Non-AD                     | 0.100                   | 0.900         | 0.000      | -1.094 | 0.153  | -12.126                              | -16.529                    | 4.156                   |
| 19   | Mild to Moderate AD | <b>Non-AD</b>              | 0.041                   | 0.959         | 0.000      | -1.447 | -0.357 | -11.434                              | -17.714                    | 9.624                   |
| 20   | Mild to Moderate AD | Mild to Moderate AD        | 0.877                   | 0.004         | 0.119      | 0.567  | 1.280  | -12.425                              | -1.581                     | -8.431                  |
| 21   | Mild to Moderate AD | <b>Non-AD</b>              | 0.042                   | 0.958         | 0.000      | -1.619 | -0.229 | -11.211                              | -17.464                    | 10.871                  |
| 22   | Mild to Moderate AD | Mild to Moderate AD        | 0.840                   | 0.000         | 0.160      | 0.506  | 1.482  | -11.634                              | 4.680                      | -8.316                  |
| 23   | Mild to Moderate AD | Mild to Moderate AD        | 0.589                   | 0.000         | 0.411      | 2.640  | 1.526  | -10.237                              | 20.134                     | -9.514                  |
| 24   | Mild to Moderate AD | Mild to Moderate AD        | 0.613                   | 0.000         | 0.387      | 1.435  | 0.430  | -11.342                              | 8.218                      | -10.426                 |
| 25   | Mild to Moderate AD | Mild to Moderate AD        | 0.916                   | 0.001         | 0.083      | 0.154  | 1.330  | -11.640                              | 2.181                      | -6.842                  |
| 26   | Mild to Moderate AD | <b>Non-AD</b>              | 0.279                   | 0.720         | 0.001      | -0.464 | 0.454  | -12.858                              | -14.756                    | -1.788                  |
| 27   | Mild to Moderate AD | Mild to Moderate AD        | 0.994                   | 0.000         | 0.006      | -0.295 | -0.784 | -9.573                               | 6.659                      | 0.740                   |
| 28   | Mild to Moderate AD | Mild to Moderate AD        | 0.687                   | 0.000         | 0.313      | 1.614  | 1.070  | -12.288                              | 2.962                      | -10.715                 |
| 29   | Severe AD           | Severe AD                  | 0.000                   | 0.000         | 1.000      | 4.143  | -0.962 | 22.885                               | 266.999                    | -9.108                  |
| 30   | Severe AD           | Severe AD                  | 0.000                   | 0.000         | 1.000      | 3.686  | -2.004 | 37.574                               | 378.248                    | -10.414                 |
| 31   | Severe AD           | Severe AD                  | 0.269                   | 0.000         | 0.731      | 1.438  | -0.209 | -7.928                               | 32.561                     | -9.929                  |
| 32   | Severe AD           | <b>Mild to Moderate AD</b> | 0.838                   | 0.002         | 0.160      | 0.741  | 1.366  | -12.327                              | 0.252                      | -9.018                  |
| 33   | Severe AD           | Severe AD                  | 0.092                   | 0.000         | 0.908      | 1.992  | 3.249  | -2.052                               | 84.273                     | -6.637                  |
| 34   | Severe AD           | Severe AD                  | 0.045                   | 0.000         | 0.955      | 2.136  | -0.122 | -5.161                               | 55.877                     | -11.281                 |
| 35   | Severe AD           | Severe AD                  | 0.000                   | 0.000         | 1.000      | 3.361  | -1.785 | 28.913                               | 312.914                    | -10.791                 |
| 36   | Severe AD           | Severe AD                  | 0.000                   | 0.000         | 1.000      | 3.032  | -2.124 | 31.882                               | 334.641                    | -10.402                 |

**Table S15.** Factor scores for clones 12III1 and 12CIII3. Probability to belonging to Non-AD, Mild-to-Moderate AD and Severe AD groups, and the squared Mahalanobis distances to the centroid of the group of tested 36 sera. Incorrectly discriminated sera are in bold.

| Sera | Prior               | Posterior                  | Pr(Mild to moderate AD) | Pr(Severe AD) | Pr(Non-AD) | F1     | F2     | D <sup>2</sup> (Mild to moderate AD) | D <sup>2</sup> (Severe AD) | D <sup>2</sup> (Non-AD) |
|------|---------------------|----------------------------|-------------------------|---------------|------------|--------|--------|--------------------------------------|----------------------------|-------------------------|
| 1    | Non-AD              | Non-AD                     | 0.014                   | 0.986         | 0.000      | -2.352 | -0.647 | -9.356                               | -17.836                    | 26.620                  |
| 2    | Non-AD              | Non-AD                     | 0.011                   | 0.989         | 0.000      | -2.149 | -0.659 | -9.676                               | -18.621                    | 24.577                  |
| 3    | Non-AD              | Non-AD                     | 0.013                   | 0.987         | 0.000      | -2.302 | -0.613 | -9.491                               | -18.169                    | 26.013                  |
| 4    | Non-AD              | Non-AD                     | 0.016                   | 0.984         | 0.000      | -2.273 | -0.445 | -9.761                               | -18.049                    | 25.330                  |
| 5    | Non-AD              | Non-AD                     | 0.020                   | 0.980         | 0.000      | -2.164 | -0.177 | -10.235                              | -18.058                    | 23.821                  |
| 6    | Non-AD              | Non-AD                     | 0.011                   | 0.989         | 0.000      | -2.233 | -0.638 | -9.571                               | -18.538                    | 25.373                  |
| 7    | Non-AD              | Non-AD                     | 0.011                   | 0.989         | 0.000      | -2.260 | -0.648 | -9.513                               | -18.438                    | 25.671                  |
| 8    | Non-AD              | Non-AD                     | 0.012                   | 0.988         | 0.000      | -2.148 | -0.740 | -9.559                               | -18.444                    | 24.799                  |
| 9    | Non-AD              | Non-AD                     | 0.011                   | 0.989         | 0.000      | -2.247 | -0.707 | -9.449                               | -18.476                    | 25.701                  |
| 10   | Non-AD              | Non-AD                     | 0.012                   | 0.988         | 0.000      | -2.278 | -0.664 | -9.459                               | -18.358                    | 25.904                  |
| 11   | Non-AD              | Non-AD                     | 0.014                   | 0.986         | 0.000      | -2.342 | -0.654 | -9.363                               | -17.934                    | 26.535                  |
| 12   | Non-AD              | <b>Mild to Moderate AD</b> | 0.607                   | 0.393         | 0.000      | -1.445 | 1.509  | -11.486                              | -10.615                    | 20.027                  |
| 13   | Non-AD              | Non-AD                     | 0.445                   | 0.555         | 0.000      | -1.279 | 1.228  | -11.708                              | -12.149                    | 17.430                  |
| 14   | Non-AD              | Non-AD                     | 0.025                   | 0.975         | 0.000      | -1.907 | -0.591 | -10.121                              | -17.431                    | 22.012                  |
| 15   | Non-AD              | <b>Mild to Moderate AD</b> | 0.694                   | 0.306         | 0.000      | -1.608 | -0.911 | -10.023                              | -8.385                     | 20.100                  |
| 16   | Non-AD              | Non-AD                     | 0.013                   | 0.987         | 0.000      | -2.061 | -0.401 | -10.144                              | -18.824                    | 23.120                  |
| 17   | Non-AD              | Non-AD                     | 0.011                   | 0.989         | 0.000      | -2.214 | -0.637 | -9.603                               | -18.592                    | 25.182                  |
| 18   | Non-AD              | Non-AD                     | 0.026                   | 0.974         | 0.000      | -1.807 | -0.148 | -10.755                              | -18.040                    | 20.304                  |
| 19   | Mild to Moderate AD | <b>Non-AD</b>              | 0.015                   | 0.985         | 0.000      | -2.269 | -0.447 | -9.764                               | -18.085                    | 25.296                  |
| 20   | Mild to Moderate AD | Mild to Moderate AD        | 0.815                   | 0.185         | 0.000      | -1.293 | 1.755  | -11.438                              | -8.477                     | 19.955                  |
| 21   | Mild to Moderate AD | <b>Non-AD</b>              | 0.013                   | 0.987         | 0.000      | -2.289 | -0.581 | -9.556                               | -18.211                    | 25.803                  |
| 22   | Mild to Moderate AD | Mild to Moderate AD        | 0.856                   | 0.144         | 0.000      | -1.370 | 1.798  | -11.358                              | -7.790                     | 20.847                  |
| 23   | Mild to Moderate AD | Mild to Moderate AD        | 1.000                   | 0.000         | 0.000      | -0.580 | 3.711  | -8.478                               | 19.448                     | 31.414                  |
| 24   | Mild to Moderate AD | Mild to Moderate AD        | 0.990                   | 0.000         | 0.010      | 1.324  | 0.980  | -10.480                              | 175.680                    | -1.250                  |
| 25   | Mild to Moderate AD | Mild to Moderate AD        | 0.819                   | 0.181         | 0.000      | -1.044 | 1.183  | -11.845                              | -8.825                     | 15.289                  |
| 26   | Mild to Moderate AD | Mild to Moderate AD        | 0.853                   | 0.000         | 0.147      | 2.232  | -1.593 | -6.794                               | 498.784                    | -3.280                  |
| 27   | Mild to Moderate AD | Mild to Moderate AD        | 1.000                   | 0.000         | 0.000      | -0.758 | -0.162 | -11.539                              | 15.640                     | 11.085                  |
| 28   | Mild to Moderate AD | Mild to Moderate AD        | 0.999                   | 0.000         | 0.001      | 0.871  | 1.637  | -10.777                              | 100.072                    | 4.036                   |
| 29   | Severe AD           | Severe AD                  | 0.000                   | 0.000         | 1.000      | 7.393  | 0.131  | 15.142                               | 1943.691                   | -10.025                 |
| 30   | Severe AD           | Severe AD                  | 0.001                   | 0.000         | 0.999      | 5.016  | 0.603  | 1.332                                | 1013.966                   | -12.221                 |
| 31   | Severe AD           | Severe AD                  | 0.000                   | 0.000         | 1.000      | 6.190  | -1.917 | 9.269                                | 1764.229                   | -8.268                  |
| 32   | Severe AD           | Severe AD                  | 0.099                   | 0.000         | 0.901      | 3.173  | -0.494 | -5.727                               | 617.911                    | -10.138                 |
| 33   | Severe AD           | Severe AD                  | 0.000                   | 0.000         | 1.000      | 5.755  | 0.065  | 5.063                                | 1319.896                   | -13.038                 |
| 34   | Severe AD           | Severe AD                  | 0.001                   | 0.000         | 0.999      | 5.003  | -0.469 | 1.429                                | 1132.590                   | -13.176                 |
| 35   | Severe AD           | Severe AD                  | 0.001                   | 0.000         | 0.999      | 4.981  | 0.338  | 1.112                                | 1032.294                   | -12.802                 |
| 36   | Severe AD           | Severe AD                  | 0.001                   | 0.000         | 0.999      | 4.734  | 0.004  | -0.012                               | 993.564                    | -13.083                 |

**Table S16.** Factor scores for clones 12III15 and 12IV14. Probability to belonging to Non-AD, Mild-to-Moderate AD and Severe AD groups, and the squared Mahalanobis distances to the centroid of the group of tested 36 sera. Incorrectly discriminated sera are in bold.

| Sera | Prior               | Posterior                  | Pr(Mild to moderate AD) | Pr(Severe AD) | Pr(Non-AD) | F1     | F2     | D <sup>2</sup> (Mild to moderate AD) | D <sup>2</sup> (Severe AD) | D <sup>2</sup> (Non-AD) |
|------|---------------------|----------------------------|-------------------------|---------------|------------|--------|--------|--------------------------------------|----------------------------|-------------------------|
| 1    | Non-AD              | Non-AD                     | 0.023                   | 0.976         | 0.001      | -1.321 | 0.101  | -10.967                              | -18.447                    | -3.739                  |
| 2    | Non-AD              | Non-AD                     | 0.020                   | 0.980         | 0.001      | -1.308 | 0.059  | -11.063                              | -18.883                    | -3.737                  |
| 3    | Non-AD              | Non-AD                     | 0.015                   | 0.985         | 0.000      | -1.474 | -0.092 | -10.785                              | -19.170                    | -2.972                  |
| 4    | Non-AD              | Non-AD                     | 0.198                   | 0.799         | 0.003      | -1.237 | -0.596 | -11.510                              | -14.301                    | -3.105                  |
| 5    | Non-AD              | Non-AD                     | 0.038                   | 0.961         | 0.001      | -0.917 | -0.260 | -12.065                              | -18.511                    | -4.660                  |
| 6    | Non-AD              | Non-AD                     | 0.014                   | 0.985         | 0.000      | -1.463 | -0.060 | -10.776                              | -19.236                    | -3.052                  |
| 7    | Non-AD              | Non-AD                     | 0.015                   | 0.985         | 0.000      | -1.473 | -0.085 | -10.778                              | -19.184                    | -2.985                  |
| 8    | Non-AD              | Non-AD                     | 0.015                   | 0.985         | 0.000      | -1.486 | -0.080 | -10.734                              | -19.111                    | -2.945                  |
| 9    | Non-AD              | Non-AD                     | 0.014                   | 0.986         | 0.000      | -1.433 | -0.034 | -10.829                              | -19.322                    | -3.191                  |
| 10   | Non-AD              | Non-AD                     | 0.014                   | 0.985         | 0.000      | -1.460 | -0.065 | -10.792                              | -19.257                    | -3.058                  |
| 11   | Non-AD              | Non-AD                     | 0.014                   | 0.985         | 0.000      | -1.466 | -0.069 | -10.780                              | -19.229                    | -3.033                  |
| 12   | Non-AD              | Non-AD                     | 0.350                   | 0.637         | 0.013      | -0.523 | -0.369 | -12.312                              | -13.514                    | -5.724                  |
| 13   | Non-AD              | Non-AD                     | 0.250                   | 0.746         | 0.005      | -1.026 | -0.653 | -11.738                              | -13.926                    | -3.755                  |
| 14   | Non-AD              | Non-AD                     | 0.022                   | 0.978         | 0.001      | -1.296 | 0.076  | -11.071                              | -18.686                    | -3.794                  |
| 15   | Non-AD              | Non-AD                     | 0.019                   | 0.980         | 0.000      | -1.291 | -0.267 | -11.405                              | -19.271                    | -3.400                  |
| 16   | Non-AD              | Non-AD                     | 0.345                   | 0.643         | 0.012      | -0.640 | -0.074 | -12.398                              | -13.641                    | -5.708                  |
| 17   | Non-AD              | Non-AD                     | 0.017                   | 0.983         | 0.000      | -1.279 | 0.000  | -11.213                              | -19.340                    | -3.769                  |
| 18   | Non-AD              | Non-AD                     | 0.014                   | 0.986         | 0.000      | -1.314 | -0.085 | -11.216                              | -19.728                    | -3.551                  |
| 19   | Mild to Moderate AD | <b>Non-AD</b>              | 0.019                   | 0.980         | 0.000      | -1.340 | -0.259 | -11.288                              | -19.126                    | -3.234                  |
| 20   | Mild to Moderate AD | Mild to Moderate AD        | 0.827                   | 0.000         | 0.173      | 0.714  | 1.449  | -11.879                              | 157.147                    | -8.751                  |
| 21   | Mild to Moderate AD | <b>Non-AD</b>              | 0.021                   | 0.979         | 0.001      | -1.313 | 0.077  | -11.024                              | -18.712                    | -3.738                  |
| 22   | Mild to Moderate AD | Mild to Moderate AD        | 0.906                   | 0.000         | 0.094      | -0.026 | 0.940  | -12.252                              | 55.689                     | -7.713                  |
| 23   | Mild to Moderate AD | Mild to Moderate AD        | 0.859                   | 0.000         | 0.141      | 0.025  | -1.180 | -9.706                               | 11.018                     | -6.091                  |
| 24   | Mild to Moderate AD | Mild to Moderate AD        | 0.626                   | 0.000         | 0.374      | 1.314  | 0.318  | -10.805                              | 101.846                    | -9.775                  |
| 25   | Mild to Moderate AD | <b>Non-AD</b>              | 0.015                   | 0.984         | 0.000      | -1.308 | -0.190 | -11.320                              | -19.648                    | -3.440                  |
| 26   | Mild to Moderate AD | Mild to Moderate AD        | 0.661                   | 0.000         | 0.339      | 1.449  | 2.458  | -9.454                               | 386.697                    | -8.118                  |
| 27   | Mild to Moderate AD | Mild to Moderate AD        | 0.950                   | 0.009         | 0.041      | -0.511 | -1.019 | -11.101                              | -1.827                     | -4.822                  |
| 28   | Mild to Moderate AD | Mild to Moderate AD        | 0.622                   | 0.000         | 0.378      | 1.754  | 1.237  | -10.747                              | 232.817                    | -9.747                  |
| 29   | Severe AD           | Severe AD                  | 0.000                   | 0.000         | 1.000      | 3.902  | -1.191 | 17.394                               | 308.967                    | -9.843                  |
| 30   | Severe AD           | Severe AD                  | 0.000                   | 0.000         | 1.000      | 3.513  | -2.174 | 23.706                               | 262.993                    | -9.114                  |
| 31   | Severe AD           | <b>Mild to Moderate AD</b> | 0.696                   | 0.000         | 0.304      | 0.250  | -1.444 | -7.879                               | 26.378                     | -6.220                  |
| 32   | Severe AD           | <b>Mild to Moderate AD</b> | 0.602                   | 0.000         | 0.398      | 1.991  | 2.691  | -8.509                               | 504.273                    | -7.681                  |
| 33   | Severe AD           | <b>Mild to Moderate AD</b> | 0.818                   | 0.000         | 0.182      | 0.426  | 1.649  | -11.234                              | 157.926                    | -8.231                  |
| 34   | Severe AD           | Severe AD                  | 0.052                   | 0.000         | 0.948      | 3.119  | 0.924  | -4.009                               | 368.393                    | -9.817                  |
| 35   | Severe AD           | Severe AD                  | 0.000                   | 0.000         | 1.000      | 4.492  | -0.588 | 18.415                               | 426.363                    | -9.279                  |
| 36   | Severe AD           | Severe AD                  | 0.000                   | 0.000         | 1.000      | 3.958  | -1.148 | 17.604                               | 317.889                    | -9.819                  |

**Table S17.** Factor scores for clones 12III15 and 12CIII3. Probability to belonging to Non-AD, Mild-to-Moderate AD and Severe AD groups, and the squared Mahalanobis distances to the centroid of the group of tested 36 sera. Incorrectly discriminated sera are in bold.

| Sera | Prior               | Posterior                  | Pr(Mild to moderate AD) | Pr(Severe AD) | Pr(Non-AD) | F1     | F2     | D <sup>2</sup> (Mild to moderate AD) | D <sup>2</sup> (Severe AD) | D <sup>2</sup> (Non-AD) |
|------|---------------------|----------------------------|-------------------------|---------------|------------|--------|--------|--------------------------------------|----------------------------|-------------------------|
| 1    | Non-AD              | Non-AD                     | 0.015                   | 0.985         | 0.000      | -2.061 | -0.191 | -11.761                              | -20.106                    | 49.945                  |
| 2    | Non-AD              | Non-AD                     | 0.011                   | 0.989         | 0.000      | -1.889 | -0.296 | -11.726                              | -20.810                    | 47.346                  |
| 3    | Non-AD              | Non-AD                     | 0.016                   | 0.984         | 0.000      | -2.087 | -0.414 | -11.399                              | -19.656                    | 51.142                  |
| 4    | Non-AD              | Non-AD                     | 0.016                   | 0.984         | 0.000      | -2.097 | -0.315 | -11.558                              | -19.795                    | 50.976                  |
| 5    | Non-AD              | Non-AD                     | 0.031                   | 0.969         | 0.000      | -1.986 | 0.091  | -12.097                              | -19.011                    | 47.758                  |
| 6    | Non-AD              | Non-AD                     | 0.012                   | 0.988         | 0.000      | -2.016 | -0.433 | -11.410                              | -20.185                    | 49.981                  |
| 7    | Non-AD              | Non-AD                     | 0.013                   | 0.987         | 0.000      | -2.039 | -0.439 | -11.385                              | -19.997                    | 50.399                  |
| 8    | Non-AD              | Non-AD                     | 0.012                   | 0.988         | 0.000      | -1.919 | -0.524 | -11.285                              | -20.073                    | 48.627                  |
| 9    | Non-AD              | Non-AD                     | 0.011                   | 0.989         | 0.000      | -1.994 | -0.404 | -11.477                              | -20.418                    | 49.503                  |
| 10   | Non-AD              | Non-AD                     | 0.013                   | 0.987         | 0.000      | -2.044 | -0.414 | -11.427                              | -20.055                    | 50.400                  |
| 11   | Non-AD              | Non-AD                     | 0.017                   | 0.983         | 0.000      | -2.102 | -0.387 | -11.436                              | -19.581                    | 51.312                  |
| 12   | Non-AD              | Non-AD                     | 0.242                   | 0.758         | 0.000      | -1.860 | 0.418  | -12.307                              | -14.588                    | 44.683                  |
| 13   | Non-AD              | Non-AD                     | 0.014                   | 0.986         | 0.000      | -1.784 | -0.287 | -11.798                              | -20.325                    | 45.543                  |
| 14   | Non-AD              | Non-AD                     | 0.020                   | 0.980         | 0.000      | -1.708 | -0.387 | -11.658                              | -19.463                    | 44.613                  |
| 15   | Non-AD              | <b>Mild to Moderate AD</b> | 0.551                   | 0.449         | 0.000      | -1.381 | -0.697 | -11.021                              | -10.612                    | 40.336                  |
| 16   | Non-AD              | Non-AD                     | 0.190                   | 0.810         | 0.000      | -1.739 | 0.315  | -12.390                              | -15.288                    | 42.985                  |
| 17   | Non-AD              | Non-AD                     | 0.011                   | 0.989         | 0.000      | -1.948 | -0.248 | -11.762                              | -20.784                    | 48.190                  |
| 18   | Non-AD              | Non-AD                     | 0.013                   | 0.987         | 0.000      | -1.790 | -0.411 | -11.575                              | -20.190                    | 46.066                  |
| 19   | Mild to Moderate AD | <b>Non-AD</b>              | 0.016                   | 0.984         | 0.000      | -2.093 | -0.317 | -11.557                              | -19.834                    | 50.918                  |
| 20   | Mild to Moderate AD | Mild to Moderate AD        | 1.000                   | 0.000         | 0.000      | -1.350 | 2.115  | -9.626                               | 63.257                     | 33.193                  |
| 21   | Mild to Moderate AD | <b>Non-AD</b>              | 0.013                   | 0.987         | 0.000      | -2.031 | -0.209 | -11.759                              | -20.372                    | 49.486                  |
| 22   | Mild to Moderate AD | Mild to Moderate AD        | 1.000                   | 0.000         | 0.000      | -1.661 | 1.301  | -11.609                              | 13.168                     | 39.311                  |
| 23   | Mild to Moderate AD | Mild to Moderate AD        | 0.905                   | 0.095         | 0.000      | -1.802 | 0.719  | -12.249                              | -7.752                     | 42.914                  |
| 24   | Mild to Moderate AD | Mild to Moderate AD        | 1.000                   | 0.000         | 0.000      | 1.134  | 0.891  | -11.701                              | 282.193                    | 5.338                   |
| 25   | Mild to Moderate AD | <b>Non-AD</b>              | 0.047                   | 0.953         | 0.000      | -1.612 | -0.549 | -11.353                              | -17.355                    | 43.567                  |
| 26   | Mild to Moderate AD | Mild to Moderate AD        | 0.597                   | 0.000         | 0.403      | 2.945  | 0.673  | -7.944                               | 707.673                    | -7.158                  |
| 27   | Mild to Moderate AD | Mild to Moderate AD        | 1.000                   | 0.000         | 0.000      | -0.786 | -0.443 | -11.585                              | 17.235                     | 30.545                  |
| 28   | Mild to Moderate AD | Mild to Moderate AD        | 1.000                   | 0.000         | 0.000      | 0.730  | 1.942  | -10.777                              | 262.666                    | 8.253                   |
| 29   | Severe AD           | Severe AD                  | 0.000                   | 0.000         | 1.000      | 6.977  | -0.279 | 13.055                               | 2347.975                   | -8.247                  |
| 30   | Severe AD           | Severe AD                  | 0.005                   | 0.000         | 0.995      | 4.680  | 0.345  | -1.290                               | 1295.506                   | -12.059                 |
| 31   | Severe AD           | Severe AD                  | 0.000                   | 0.000         | 1.000      | 5.694  | -3.672 | 34.378                               | 1803.381                   | -8.470                  |
| 32   | Severe AD           | Severe AD                  | 0.188                   | 0.000         | 0.812      | 3.516  | 1.012  | -6.639                               | 898.118                    | -9.559                  |
| 33   | Severe AD           | Severe AD                  | 0.000                   | 0.000         | 1.000      | 4.968  | -1.977 | 12.698                               | 1409.689                   | -10.945                 |
| 34   | Severe AD           | Severe AD                  | 0.002                   | 0.000         | 0.998      | 5.170  | 0.666  | 0.041                                | 1508.041                   | -12.033                 |
| 35   | Severe AD           | Severe AD                  | 0.007                   | 0.000         | 0.993      | 5.121  | 1.714  | -1.166                               | 1541.278                   | -11.088                 |
| 36   | Severe AD           | Severe AD                  | 0.007                   | 0.000         | 0.993      | 4.844  | 1.094  | -2.025                               | 1390.935                   | -11.815                 |

**Table S18.** Factor scores for clones 12CIII3 and 12IV14. Probability to belonging to Non-AD, Mild-to-Moderate AD and Severe AD groups, and the squared Mahalanobis distances to the centroid of the group of tested 36 sera. Incorrectly discriminated sera are in bold.

| Sera | Prior               | Posterior                  | Pr(Mild to moderate AD) | Pr(Severe AD) | Pr(Non-AD) | F1     | F2     | D <sup>2</sup> (Mild to moderate AD) | D <sup>2</sup> (Severe AD) | D <sup>2</sup> (Non-AD) |
|------|---------------------|----------------------------|-------------------------|---------------|------------|--------|--------|--------------------------------------|----------------------------|-------------------------|
| 1    | Non-AD              | Non-AD                     | 0.025                   | 0.975         | 0.000      | -2.070 | -0.205 | -11.828                              | -19.119                    | 22.632                  |
| 2    | Non-AD              | Non-AD                     | 0.018                   | 0.982         | 0.000      | -1.881 | -0.246 | -12.046                              | -20.007                    | 20.788                  |
| 3    | Non-AD              | Non-AD                     | 0.022                   | 0.978         | 0.000      | -2.033 | -0.197 | -11.914                              | -19.493                    | 22.293                  |
| 4    | Non-AD              | Non-AD                     | 0.054                   | 0.946         | 0.000      | -1.925 | 0.323  | -12.809                              | -18.553                    | 22.330                  |
| 5    | Non-AD              | Non-AD                     | 0.054                   | 0.946         | 0.000      | -1.925 | 0.323  | -12.809                              | -18.553                    | 22.330                  |
| 6    | Non-AD              | Non-AD                     | 0.019                   | 0.981         | 0.000      | -1.969 | -0.241 | -11.913                              | -19.796                    | 21.613                  |
| 7    | Non-AD              | Non-AD                     | 0.019                   | 0.981         | 0.000      | -1.986 | -0.223 | -11.931                              | -19.767                    | 21.800                  |
| 8    | Non-AD              | Non-AD                     | 0.020                   | 0.980         | 0.000      | -1.861 | -0.292 | -11.961                              | -19.788                    | 20.524                  |
| 9    | Non-AD              | Non-AD                     | 0.019                   | 0.981         | 0.000      | -1.956 | -0.243 | -11.931                              | -19.851                    | 21.484                  |
| 10   | Non-AD              | Non-AD                     | 0.020                   | 0.980         | 0.000      | -1.997 | -0.222 | -11.914                              | -19.698                    | 21.908                  |
| 11   | Non-AD              | Non-AD                     | 0.024                   | 0.976         | 0.000      | -2.056 | -0.198 | -11.872                              | -19.283                    | 22.505                  |
| 12   | Non-AD              | Non-AD                     | 0.264                   | 0.736         | 0.000      | -1.794 | 0.659  | -12.809                              | -14.854                    | 21.856                  |
| 13   | Non-AD              | Non-AD                     | 0.122                   | 0.878         | 0.000      | -1.600 | 0.390  | -13.099                              | -17.049                    | 19.480                  |
| 14   | Non-AD              | Non-AD                     | 0.036                   | 0.964         | 0.000      | -1.698 | -0.331 | -12.113                              | -18.673                    | 18.979                  |
| 15   | Non-AD              | <b>Mild to Moderate AD</b> | 0.790                   | 0.210         | 0.000      | -1.266 | -0.259 | -12.804                              | -10.154                    | 15.356                  |
| 16   | Non-AD              | Non-AD                     | 0.055                   | 0.945         | 0.000      | -1.739 | 0.319  | -12.992                              | -18.698                    | 20.594                  |
| 17   | Non-AD              | Non-AD                     | 0.018                   | 0.982         | 0.000      | -1.929 | -0.159 | -12.178                              | -20.187                    | 21.389                  |
| 18   | Non-AD              | Non-AD                     | 0.025                   | 0.975         | 0.000      | -1.739 | -0.206 | -12.359                              | -19.698                    | 19.567                  |
| 19   | Mild to Moderate AD | <b>Non-AD</b>              | 0.025                   | 0.975         | 0.000      | -2.004 | 0.022  | -12.408                              | -19.702                    | 22.450                  |
| 20   | Mild to Moderate AD | <b>Non-AD</b>              | 0.043                   | 0.957         | 0.000      | -1.847 | 0.288  | -12.879                              | -19.100                    | 21.524                  |
| 21   | Mild to Moderate AD | <b>Non-AD</b>              | 0.022                   | 0.978         | 0.000      | -2.033 | -0.197 | -11.914                              | -19.493                    | 22.293                  |
| 22   | Mild to Moderate AD | <b>Non-AD</b>              | 0.032                   | 0.968         | 0.000      | -1.978 | 0.145  | -12.613                              | -19.447                    | 22.447                  |
| 23   | Mild to Moderate AD | Mild to Moderate AD        | 1.000                   | 0.000         | 0.000      | -1.555 | 1.599  | -10.017                              | 9.861                      | 22.071                  |
| 24   | Mild to Moderate AD | Mild to Moderate AD        | 0.997                   | 0.000         | 0.003      | 0.994  | 0.359  | -11.031                              | 189.232                    | 0.488                   |
| 25   | Mild to Moderate AD | <b>Non-AD</b>              | 0.102                   | 0.898         | 0.000      | -1.525 | -0.216 | -12.615                              | -16.957                    | 17.650                  |
| 26   | Mild to Moderate AD | Mild to Moderate AD        | 0.598                   | 0.000         | 0.402      | 2.287  | -1.722 | -7.250                               | 497.405                    | -6.453                  |
| 27   | Mild to Moderate AD | Mild to Moderate AD        | 1.000                   | 0.000         | 0.000      | -0.503 | 0.588  | -12.791                              | 27.961                     | 10.756                  |
| 28   | Mild to Moderate AD | Mild to Moderate AD        | 1.000                   | 0.000         | 0.000      | 0.293  | 0.323  | -12.422                              | 98.572                     | 4.675                   |
| 29   | Severe AD           | Severe AD                  | 0.000                   | 0.000         | 1.000      | 7.279  | 0.765  | 29.945                               | 2143.838                   | -8.743                  |
| 30   | Severe AD           | Severe AD                  | 0.000                   | 0.000         | 1.000      | 5.187  | 2.124  | 26.926                               | 1258.623                   | -10.026                 |
| 31   | Severe AD           | Severe AD                  | 0.000                   | 0.000         | 1.000      | 6.287  | -1.494 | 8.626                                | 1806.790                   | -9.468                  |
| 32   | Severe AD           | Severe AD                  | 0.321                   | 0.000         | 0.679      | 2.777  | -1.686 | -6.429                               | 612.354                    | -7.930                  |
| 33   | Severe AD           | Severe AD                  | 0.001                   | 0.000         | 0.999      | 4.684  | -2.981 | 4.891                                | 1297.552                   | -8.985                  |
| 34   | Severe AD           | Severe AD                  | 0.001                   | 0.000         | 0.999      | 4.889  | -0.394 | 2.587                                | 1189.133                   | -11.359                 |
| 35   | Severe AD           | Severe AD                  | 0.000                   | 0.000         | 1.000      | 5.144  | 1.721  | 21.323                               | 1239.839                   | -10.483                 |
| 36   | Severe AD           | Severe AD                  | 0.000                   | 0.000         | 1.000      | 5.048  | 1.764  | 21.036                               | 1205.776                   | -10.381                 |

**Table S19.** Factor scores for clones 12CIII1/12CIII3 and 12III1. Probability to belonging to Non-AD, Mild-to-Moderate AD and Severe AD groups, and the squared Mahalanobis distances to the centroid of the group of tested 36 sera. Incorrectly discriminated sera are in bold.

| Sera | Prior               | Posterior           | Pr(Mild to moderate AD) | Pr(Severe AD) | Pr(Non-AD) | F1     | F2     | D <sup>2</sup> (Mild to moderate AD) | D <sup>2</sup> (Severe AD) | D <sup>2</sup> (Non-AD) |
|------|---------------------|---------------------|-------------------------|---------------|------------|--------|--------|--------------------------------------|----------------------------|-------------------------|
| 1    | Non-AD              | Non-AD              | 0.002                   | 0.998         | 0.000      | -2.551 | -0.567 | -16.428                              | -28.661                    | 43.173                  |
| 2    | Non-AD              | Non-AD              | 0.002                   | 0.998         | 0.000      | -2.318 | -0.533 | -16.832                              | -29.549                    | 39.393                  |
| 3    | Non-AD              | Non-AD              | 0.002                   | 0.998         | 0.000      | -2.524 | -0.605 | -16.469                              | -28.799                    | 42.806                  |
| 4    | Non-AD              | Non-AD              | 0.002                   | 0.998         | 0.000      | -2.455 | -0.411 | -16.795                              | -28.961                    | 38.894                  |
| 5    | Non-AD              | Non-AD              | 0.119                   | 0.881         | 0.000      | -2.220 | 0.035  | -17.513                              | -21.516                    | 30.692                  |
| 6    | Non-AD              | Non-AD              | 0.002                   | 0.998         | 0.000      | -2.464 | -0.649 | -16.527                              | -29.081                    | 42.455                  |
| 7    | Non-AD              | Non-AD              | 0.002                   | 0.998         | 0.000      | -2.482 | -0.633 | -16.505                              | -29.061                    | 42.675                  |
| 8    | Non-AD              | Non-AD              | 0.002                   | 0.998         | 0.000      | -2.371 | -0.708 | -16.585                              | -29.049                    | 42.361                  |
| 9    | Non-AD              | Non-AD              | 0.002                   | 0.998         | 0.000      | -2.459 | -0.651 | -16.498                              | -29.150                    | 42.955                  |
| 10   | Non-AD              | Non-AD              | 0.002                   | 0.998         | 0.000      | -2.475 | -0.583 | -16.541                              | -29.262                    | 42.261                  |
| 11   | Non-AD              | Non-AD              | 0.002                   | 0.998         | 0.000      | -2.551 | -0.596 | -16.407                              | -28.622                    | 43.479                  |
| 12   | Non-AD              | Non-AD              | 0.021                   | 0.979         | 0.000      | -2.009 | -0.141 | -13.841                              | -21.564                    | 24.513                  |
| 13   | Non-AD              | Non-AD              | 0.014                   | 0.986         | 0.000      | -1.827 | -0.303 | -14.620                              | -23.079                    | 23.187                  |
| 14   | Non-AD              | Non-AD              | 0.039                   | 0.961         | 0.000      | -1.979 | -0.299 | -17.471                              | -23.873                    | 32.115                  |
| 15   | Non-AD              | Non-AD              | 0.244                   | 0.756         | 0.000      | -1.834 | -0.892 | -17.089                              | -19.355                    | 37.332                  |
| 16   | Non-AD              | Non-AD              | 0.002                   | 0.998         | 0.000      | -2.306 | -0.553 | -16.916                              | -29.794                    | 37.494                  |
| 17   | Non-AD              | Non-AD              | 0.003                   | 0.997         | 0.000      | -2.335 | -0.399 | -16.876                              | -28.770                    | 38.403                  |
| 18   | Non-AD              | Non-AD              | 0.004                   | 0.996         | 0.000      | -2.175 | -0.704 | -16.716                              | -27.894                    | 35.204                  |
| 19   | Mild to Moderate AD | Mild to Moderate AD | 0.998                   | 0.002         | 0.000      | -2.127 | 0.327  | -17.235                              | -5.250                     | 29.467                  |
| 20   | Mild to Moderate AD | Mild to Moderate AD | 1.000                   | 0.000         | 0.000      | -1.176 | 1.551  | -18.438                              | 81.773                     | 12.403                  |
| 21   | Mild to Moderate AD | Mild to Moderate AD | 0.998                   | 0.002         | 0.000      | -2.122 | 0.302  | -16.990                              | -4.569                     | 30.420                  |
| 22   | Mild to Moderate AD | Mild to Moderate AD | 1.000                   | 0.000         | 0.000      | -0.260 | 3.849  | -15.948                              | 558.579                    | 19.875                  |
| 23   | Mild to Moderate AD | Mild to Moderate AD | 1.000                   | 0.000         | 0.000      | 0.238  | 4.304  | -15.847                              | 615.110                    | 39.635                  |
| 24   | Mild to Moderate AD | Mild to Moderate AD | 0.986                   | 0.000         | 0.014      | 1.657  | 1.214  | -17.965                              | 407.017                    | -9.448                  |
| 25   | Mild to Moderate AD | <b>Non-AD</b>       | 0.080                   | 0.920         | 0.000      | -1.657 | -0.510 | -14.089                              | -18.975                    | 22.424                  |
| 26   | Mild to Moderate AD | Mild to Moderate AD | 0.998                   | 0.000         | 0.002      | 2.289  | -1.168 | -14.259                              | 556.322                    | -1.494                  |
| 27   | Mild to Moderate AD | Mild to Moderate AD | 1.000                   | 0.000         | 0.000      | -0.431 | 0.739  | -18.845                              | 110.226                    | 6.556                   |
| 28   | Mild to Moderate AD | Mild to Moderate AD | 1.000                   | 0.000         | 0.000      | 1.310  | 1.932  | -18.259                              | 398.959                    | -3.012                  |
| 29   | Severe AD           | Severe AD           | 0.000                   | 0.000         | 1.000      | 7.434  | -0.761 | 8.066                                | 2291.368                   | -17.617                 |
| 30   | Severe AD           | Severe AD           | 0.002                   | 0.000         | 0.998      | 5.383  | 0.584  | -6.147                               | 1438.309                   | -18.312                 |
| 31   | Severe AD           | Severe AD           | 0.000                   | 0.000         | 1.000      | 6.796  | -0.626 | 3.867                                | 2208.079                   | -16.497                 |
| 32   | Severe AD           | Severe AD           | 0.038                   | 0.000         | 0.962      | 3.930  | 1.007  | -11.129                              | 1072.751                   | -17.590                 |
| 33   | Severe AD           | Severe AD           | 0.000                   | 0.000         | 1.000      | 5.561  | -1.130 | -1.138                               | 1479.549                   | -20.658                 |
| 34   | Severe AD           | Severe AD           | 0.001                   | 0.000         | 0.999      | 5.167  | -0.560 | -6.051                               | 1377.480                   | -21.242                 |
| 35   | Severe AD           | Severe AD           | 0.001                   | 0.000         | 0.999      | 4.583  | -1.324 | -3.508                               | 1112.058                   | -18.665                 |
| 36   | Severe AD           | Severe AD           | 0.001                   | 0.000         | 0.999      | 4.760  | -0.538 | -7.200                               | 1193.686                   | -21.066                 |



**Table S20.** Factor scores for clones 12CIII1/12CIII3 and 12III15. Probability to belonging to Non-AD, Mild-to-Moderate AD and Severe AD groups, and the squared Mahalanobis distances to the centroid of the group of tested 36 sera. Incorrectly discriminated sera are in bold.

| Sera | Prior               | Posterior           | Pr(Mild to moderate AD) | Pr(Severe AD) | Pr(Non-AD) | F1     | F2     | D <sup>2</sup> (Mild to moderate AD) | D <sup>2</sup> (Severe AD) | D <sup>2</sup> (Non-AD) |
|------|---------------------|---------------------|-------------------------|---------------|------------|--------|--------|--------------------------------------|----------------------------|-------------------------|
| 1    | Non-AD              | Non-AD              | 0.001                   | 0.999         | 0.000      | -2.514 | -0.538 | -16.876                              | -30.698                    | 76.294                  |
| 2    | Non-AD              | Non-AD              | 0.001                   | 0.999         | 0.000      | -2.293 | -0.526 | -17.385                              | -31.917                    | 71.517                  |
| 3    | Non-AD              | Non-AD              | 0.001                   | 0.999         | 0.000      | -2.532 | -0.619 | -16.955                              | -30.650                    | 78.499                  |
| 4    | Non-AD              | Non-AD              | 0.001                   | 0.999         | 0.000      | -2.463 | -0.423 | -17.253                              | -30.587                    | 75.047                  |
| 5    | Non-AD              | Non-AD              | 0.030                   | 0.970         | 0.000      | -2.180 | 0.068  | -17.864                              | -24.832                    | 63.702                  |
| 6    | Non-AD              | Non-AD              | 0.001                   | 0.999         | 0.000      | -2.473 | -0.664 | -17.003                              | -31.066                    | 77.480                  |
| 7    | Non-AD              | Non-AD              | 0.001                   | 0.999         | 0.000      | -2.489 | -0.650 | -16.999                              | -30.962                    | 77.806                  |
| 8    | Non-AD              | Non-AD              | 0.001                   | 0.999         | 0.000      | -2.380 | -0.734 | -17.082                              | -30.993                    | 76.221                  |
| 9    | Non-AD              | Non-AD              | 0.001                   | 0.999         | 0.000      | -2.452 | -0.657 | -17.031                              | -31.251                    | 76.755                  |
| 10   | Non-AD              | Non-AD              | 0.001                   | 0.999         | 0.000      | -2.472 | -0.596 | -17.083                              | -31.147                    | 76.909                  |
| 11   | Non-AD              | Non-AD              | 0.001                   | 0.999         | 0.000      | -2.546 | -0.603 | -16.933                              | -30.555                    | 78.606                  |
| 12   | Non-AD              | Non-AD              | 0.012                   | 0.988         | 0.000      | -2.216 | -0.116 | -16.764                              | -25.644                    | 63.667                  |
| 13   | Non-AD              | Non-AD              | 0.002                   | 0.998         | 0.000      | -2.110 | -0.397 | -17.803                              | -30.412                    | 66.466                  |
| 14   | Non-AD              | Non-AD              | 0.015                   | 0.985         | 0.000      | -1.965 | -0.326 | -18.055                              | -26.453                    | 63.337                  |
| 15   | Non-AD              | Non-AD              | 0.109                   | 0.891         | 0.000      | -1.851 | -0.937 | -17.351                              | -21.552                    | 66.158                  |
| 16   | Non-AD              | Non-AD              | 0.036                   | 0.964         | 0.000      | -2.226 | -0.436 | -16.471                              | -23.056                    | 66.257                  |
| 17   | Non-AD              | Non-AD              | 0.001                   | 0.999         | 0.000      | -2.298 | -0.390 | -17.514                              | -31.428                    | 70.559                  |
| 18   | Non-AD              | Non-AD              | 0.001                   | 0.999         | 0.000      | -2.267 | -0.737 | -17.212                              | -30.681                    | 72.903                  |
| 19   | Mild to Moderate AD | Mild to Moderate AD | 1.000                   | 0.000         | 0.000      | -2.089 | 0.277  | -18.326                              | -1.955                     | 63.244                  |
| 20   | Mild to Moderate AD | Mild to Moderate AD | 1.000                   | 0.000         | 0.000      | -1.042 | 1.816  | -14.229                              | 91.335                     | 29.673                  |
| 21   | Mild to Moderate AD | Mild to Moderate AD | 0.998                   | 0.002         | 0.000      | -2.045 | 0.282  | -18.425                              | -6.282                     | 61.603                  |
| 22   | Mild to Moderate AD | Mild to Moderate AD | 1.000                   | 0.000         | 0.000      | -0.125 | 3.838  | -17.579                              | 544.434                    | 32.358                  |
| 23   | Mild to Moderate AD | Mild to Moderate AD | 1.000                   | 0.000         | 0.000      | -0.022 | 4.062  | -15.923                              | 720.398                    | 37.129                  |
| 24   | Mild to Moderate AD | Mild to Moderate AD | 1.000                   | 0.000         | 0.000      | 1.713  | 1.280  | -18.457                              | 392.054                    | -2.423                  |
| 25   | Mild to Moderate AD | <b>Non-AD</b>       | 0.006                   | 0.994         | 0.000      | -1.987 | -0.644 | -17.657                              | -28.013                    | 66.539                  |
| 26   | Mild to Moderate AD | Mild to Moderate AD | 0.972                   | 0.000         | 0.028      | 2.611  | -0.911 | -14.889                              | 697.262                    | -7.766                  |
| 27   | Mild to Moderate AD | Mild to Moderate AD | 1.000                   | 0.000         | 0.000      | -0.432 | 0.625  | -18.325                              | 104.897                    | 30.632                  |
| 28   | Mild to Moderate AD | Mild to Moderate AD | 1.000                   | 0.000         | 0.000      | 1.468  | 2.142  | -17.818                              | 391.413                    | 0.018                   |
| 29   | Severe AD           | Severe AD           | 0.000                   | 0.000         | 1.000      | 7.345  | -0.814 | 13.758                               | 2417.698                   | -15.666                 |
| 30   | Severe AD           | Severe AD           | 0.000                   | 0.000         | 1.000      | 5.389  | 0.576  | -3.392                               | 1452.090                   | -18.968                 |
| 31   | Severe AD           | Severe AD           | 0.000                   | 0.000         | 1.000      | 6.509  | -1.259 | 59.194                               | 2158.659                   | -16.671                 |
| 32   | Severe AD           | Severe AD           | 0.069                   | 0.000         | 0.931      | 4.255  | 1.168  | -11.618                              | 1047.229                   | -16.823                 |
| 33   | Severe AD           | Severe AD           | 0.000                   | 0.000         | 1.000      | 5.176  | -1.492 | 15.584                               | 1484.141                   | -17.536                 |
| 34   | Severe AD           | Severe AD           | 0.001                   | 0.000         | 0.999      | 5.340  | -0.398 | -5.530                               | 1526.946                   | -20.251                 |
| 35   | Severe AD           | Severe AD           | 0.009                   | 0.000         | 0.991      | 4.741  | -0.953 | -7.957                               | 1538.967                   | -17.324                 |
| 36   | Severe AD           | Severe AD           | 0.004                   | 0.000         | 0.996      | 4.923  | -0.313 | -8.654                               | 1394.193                   | -19.895                 |

**Table S21.** Factor scores for clones 12CIII1/12CIII3 and 12IV14. Probability to belonging to Non-AD, Mild-to-Moderate AD and Severe AD groups, and the squared Mahalanobis distances to the centroid of the group of tested 36 sera. Incorrectly discriminated sera are in bold.

| Sera | Prior               | Posterior           | Pr(Mild to moderate AD) | Pr(Severe AD) | Pr(Non-AD) | F1     | F2     | D <sup>2</sup> (Mild to moderate AD) | D <sup>2</sup> (Severe AD) | D <sup>2</sup> (Non-AD) |
|------|---------------------|---------------------|-------------------------|---------------|------------|--------|--------|--------------------------------------|----------------------------|-------------------------|
| 1    | Non-AD              | Non-AD              | 0.002                   | 0.998         | 0.000      | -2.515 | -0.542 | -17.667                              | -30.193                    | 31.171                  |
| 2    | Non-AD              | Non-AD              | 0.002                   | 0.998         | 0.000      | -2.283 | -0.493 | -18.088                              | -30.922                    | 28.056                  |
| 3    | Non-AD              | Non-AD              | 0.002                   | 0.998         | 0.000      | -2.494 | -0.586 | -17.644                              | -30.421                    | 31.151                  |
| 4    | Non-AD              | Non-AD              | 0.002                   | 0.998         | 0.000      | -2.360 | -0.508 | -16.908                              | -29.380                    | 28.970                  |
| 5    | Non-AD              | Non-AD              | 0.042                   | 0.958         | 0.000      | -2.145 | -0.038 | -18.129                              | -24.399                    | 24.436                  |
| 6    | Non-AD              | Non-AD              | 0.002                   | 0.998         | 0.000      | -2.439 | -0.622 | -17.698                              | -30.688                    | 30.680                  |
| 7    | Non-AD              | Non-AD              | 0.002                   | 0.998         | 0.000      | -2.451 | -0.609 | -17.691                              | -30.684                    | 30.751                  |
| 8    | Non-AD              | Non-AD              | 0.002                   | 0.998         | 0.000      | -2.339 | -0.668 | -17.801                              | -30.678                    | 29.720                  |
| 9    | Non-AD              | Non-AD              | 0.001                   | 0.999         | 0.000      | -2.423 | -0.620 | -17.726                              | -30.783                    | 30.466                  |
| 10   | Non-AD              | Non-AD              | 0.001                   | 0.999         | 0.000      | -2.439 | -0.553 | -17.778                              | -30.807                    | 30.289                  |
| 11   | Non-AD              | Non-AD              | 0.002                   | 0.998         | 0.000      | -2.513 | -0.574 | -17.628                              | -30.239                    | 31.332                  |
| 12   | Non-AD              | Non-AD              | 0.006                   | 0.994         | 0.000      | -2.181 | -0.401 | -15.724                              | -25.958                    | 26.356                  |
| 13   | Non-AD              | Non-AD              | 0.004                   | 0.996         | 0.000      | -2.001 | -0.497 | -16.956                              | -28.180                    | 24.600                  |
| 14   | Non-AD              | Non-AD              | 0.099                   | 0.901         | 0.000      | -1.954 | -0.221 | -18.746                              | -23.172                    | 22.903                  |
| 15   | Non-AD              | Non-AD              | 0.204                   | 0.796         | 0.000      | -1.776 | -0.863 | -18.151                              | -20.876                    | 24.075                  |
| 16   | Non-AD              | Non-AD              | 0.003                   | 0.997         | 0.000      | -2.227 | -0.663 | -16.642                              | -28.513                    | 28.120                  |
| 17   | Non-AD              | Non-AD              | 0.002                   | 0.998         | 0.000      | -2.282 | -0.370 | -18.215                              | -30.331                    | 27.408                  |
| 18   | Non-AD              | Non-AD              | 0.002                   | 0.998         | 0.000      | -2.230 | -0.716 | -17.851                              | -30.354                    | 28.612                  |
| 19   | Mild to Moderate AD | Mild to Moderate AD | 0.999                   | 0.001         | 0.000      | -2.036 | 0.365  | -19.133                              | -5.361                     | 21.909                  |
| 20   | Mild to Moderate AD | Mild to Moderate AD | 1.000                   | 0.000         | 0.000      | -1.350 | 1.511  | -20.044                              | 111.210                    | 14.469                  |
| 21   | Mild to Moderate AD | Mild to Moderate AD | 1.000                   | 0.000         | 0.000      | -2.044 | 0.398  | -18.939                              | -0.167                     | 21.855                  |
| 22   | Mild to Moderate AD | Mild to Moderate AD | 1.000                   | 0.000         | 0.000      | -0.331 | 4.041  | -14.664                              | 710.115                    | 19.647                  |
| 23   | Mild to Moderate AD | Mild to Moderate AD | 1.000                   | 0.000         | 0.000      | 0.096  | 4.085  | -16.860                              | 679.570                    | 22.431                  |
| 24   | Mild to Moderate AD | Mild to Moderate AD | 0.995                   | 0.000         | 0.005      | 1.620  | 1.185  | -18.071                              | 403.144                    | -7.663                  |
| 25   | Mild to Moderate AD | <b>Non-AD</b>       | 0.009                   | 0.991         | 0.000      | -1.930 | -0.575 | -18.432                              | -27.757                    | 24.254                  |
| 26   | Mild to Moderate AD | Mild to Moderate AD | 0.932                   | 0.000         | 0.068      | 2.233  | -0.762 | -14.153                              | 561.200                    | -8.919                  |
| 27   | Mild to Moderate AD | Mild to Moderate AD | 1.000                   | 0.000         | 0.000      | -0.270 | 0.670  | -18.810                              | 94.235                     | 4.607                   |
| 28   | Mild to Moderate AD | Mild to Moderate AD | 1.000                   | 0.000         | 0.000      | 1.193  | 1.934  | -19.493                              | 423.038                    | -3.011                  |
| 29   | Severe AD           | Severe AD           | 0.000                   | 0.000         | 1.000      | 7.519  | -0.982 | 29.506                               | 2295.057                   | -16.620                 |
| 30   | Severe AD           | Severe AD           | 0.000                   | 0.000         | 1.000      | 5.671  | 0.121  | 30.730                               | 1431.964                   | -16.710                 |
| 31   | Severe AD           | Severe AD           | 0.000                   | 0.000         | 1.000      | 6.881  | -0.191 | 2.027                                | 2160.322                   | -17.277                 |
| 32   | Severe AD           | Severe AD           | 0.027                   | 0.000         | 0.973      | 3.820  | 1.535  | -7.870                               | 1150.340                   | -15.024                 |
| 33   | Severe AD           | Severe AD           | 0.000                   | 0.000         | 1.000      | 5.036  | -0.501 | 2.799                                | 1558.527                   | -16.099                 |
| 34   | Severe AD           | Severe AD           | 0.000                   | 0.000         | 1.000      | 5.174  | -0.467 | -3.936                               | 1352.882                   | -19.422                 |
| 35   | Severe AD           | Severe AD           | 0.000                   | 0.000         | 1.000      | 4.741  | -1.843 | 34.160                               | 1233.501                   | -16.118                 |
| 36   | Severe AD           | Severe AD           | 0.000                   | 0.000         | 1.000      | 5.028  | -0.981 | 28.338                               | 1246.202                   | -18.333                 |

**Table S22.** Factor scores obtained by using all clones simultaneously. Probability to belonging to Non-AD, Mild-to-Moderate AD and Severe AD groups, and the squared Mahalanobis distances to the centroid of the group of tested 36 sera.

| Sera | Prior               | Posterior           | Pr(Mild to moderate AD) | Pr(Severe AD) | Pr(Non-AD) | F1     | F2     | D <sup>2</sup> (Mild to moderate AD) | D <sup>2</sup> (Severe AD) | D <sup>2</sup> (Non-AD) |
|------|---------------------|---------------------|-------------------------|---------------|------------|--------|--------|--------------------------------------|----------------------------|-------------------------|
| 1    | Non-AD              | Non-AD              | 0.000                   | 1.000         | 0.000      | -2.551 | -0.535 | -33.607                              | -50.068                    | 99.780                  |
| 2    | Non-AD              | Non-AD              | 0.000                   | 1.000         | 0.000      | -2.329 | -0.524 | -34.276                              | -51.200                    | 93.380                  |
| 3    | Non-AD              | Non-AD              | 0.000                   | 1.000         | 0.000      | -2.549 | -0.646 | -33.921                              | -50.970                    | 104.215                 |
| 4    | Non-AD              | Non-AD              | 0.007                   | 0.993         | 0.000      | -2.442 | -0.648 | -32.118                              | -41.929                    | 104.550                 |
| 5    | Non-AD              | Non-AD              | 0.005                   | 0.995         | 0.000      | -2.187 | -0.085 | -33.041                              | -43.538                    | 86.639                  |
| 6    | Non-AD              | Non-AD              | 0.000                   | 1.000         | 0.000      | -2.492 | -0.676 | -34.030                              | -51.350                    | 102.339                 |
| 7    | Non-AD              | Non-AD              | 0.000                   | 1.000         | 0.000      | -2.508 | -0.672 | -33.985                              | -51.291                    | 103.095                 |
| 8    | Non-AD              | Non-AD              | 0.000                   | 1.000         | 0.000      | -2.402 | -0.748 | -34.121                              | -51.333                    | 100.632                 |
| 9    | Non-AD              | Non-AD              | 0.000                   | 1.000         | 0.000      | -2.478 | -0.673 | -33.949                              | -51.530                    | 101.243                 |
| 10   | Non-AD              | Non-AD              | 0.000                   | 1.000         | 0.000      | -2.497 | -0.621 | -34.015                              | -51.462                    | 101.858                 |
| 11   | Non-AD              | Non-AD              | 0.000                   | 1.000         | 0.000      | -2.570 | -0.632 | -33.816                              | -50.893                    | 104.281                 |
| 12   | Non-AD              | Non-AD              | 0.002                   | 0.998         | 0.000      | -2.063 | -0.119 | -29.558                              | -42.494                    | 96.247                  |
| 13   | Non-AD              | Non-AD              | 0.004                   | 0.996         | 0.000      | -1.950 | -0.418 | -31.826                              | -42.824                    | 100.846                 |
| 14   | Non-AD              | Non-AD              | 0.013                   | 0.987         | 0.000      | -2.010 | -0.305 | -35.022                              | -43.641                    | 82.056                  |
| 15   | Non-AD              | Non-AD              | 0.047                   | 0.953         | 0.000      | -1.861 | -1.004 | -34.282                              | -40.320                    | 87.635                  |
| 16   | Non-AD              | Non-AD              | 0.004                   | 0.996         | 0.000      | -2.230 | -0.552 | -29.652                              | -40.659                    | 87.250                  |
| 17   | Non-AD              | Non-AD              | 0.000                   | 1.000         | 0.000      | -2.336 | -0.424 | -34.174                              | -50.927                    | 92.939                  |
| 18   | Non-AD              | Non-AD              | 0.000                   | 1.000         | 0.000      | -2.239 | -0.688 | -34.278                              | -49.674                    | 95.767                  |
| 19   | Mild to Moderate AD | Mild to Moderate AD | 0.999                   | 0.001         | 0.000      | -2.137 | 0.139  | -34.659                              | -21.019                    | 86.290                  |
| 20   | Mild to Moderate AD | Mild to Moderate AD | 1.000                   | 0.000         | 0.000      | -1.100 | 2.161  | -31.160                              | 226.181                    | 38.644                  |
| 21   | Mild to Moderate AD | Mild to Moderate AD | 0.999                   | 0.001         | 0.000      | -2.126 | 0.237  | -34.563                              | -20.670                    | 81.094                  |
| 22   | Mild to Moderate AD | Mild to Moderate AD | 1.000                   | 0.000         | 0.000      | -0.280 | 3.998  | -30.816                              | 708.391                    | 48.901                  |
| 23   | Mild to Moderate AD | Mild to Moderate AD | 1.000                   | 0.000         | 0.000      | 0.109  | 3.747  | -31.948                              | 710.275                    | 112.470                 |
| 24   | Mild to Moderate AD | Mild to Moderate AD | 1.000                   | 0.000         | 0.000      | 1.704  | 1.323  | -34.561                              | 446.551                    | -6.628                  |
| 25   | Mild to Moderate AD | Mild to Moderate AD | 0.503                   | 0.497         | 0.000      | -1.850 | -0.436 | -29.769                              | -29.742                    | 96.263                  |
| 26   | Mild to Moderate AD | Mild to Moderate AD | 0.999                   | 0.000         | 0.001      | 2.382  | -0.220 | -30.494                              | 976.313                    | -15.693                 |
| 27   | Mild to Moderate AD | Mild to Moderate AD | 1.000                   | 0.000         | 0.000      | -0.420 | 0.238  | -33.122                              | 105.026                    | 45.360                  |
| 28   | Mild to Moderate AD | Mild to Moderate AD | 1.000                   | 0.000         | 0.000      | 1.402  | 2.407  | -34.546                              | 561.723                    | -2.173                  |
| 29   | Severe AD           | Severe AD           | 0.000                   | 0.000         | 1.000      | 7.519  | -1.126 | 15.698                               | 2543.331                   | -30.589                 |
| 30   | Severe AD           | Severe AD           | 0.000                   | 0.000         | 1.000      | 5.582  | -0.246 | 18.592                               | 1645.677                   | -30.933                 |
| 31   | Severe AD           | Severe AD           | 0.000                   | 0.000         | 1.000      | 6.519  | -1.387 | 52.165                               | 2195.287                   | -30.294                 |
| 32   | Severe AD           | Severe AD           | 0.007                   | 0.000         | 0.993      | 3.975  | 1.922  | -21.209                              | 1554.462                   | -31.018                 |
| 33   | Severe AD           | Severe AD           | 0.000                   | 0.000         | 1.000      | 5.156  | -0.416 | 56.544                               | 1769.628                   | -30.235                 |
| 34   | Severe AD           | Severe AD           | 0.001                   | 0.000         | 0.999      | 5.290  | -0.163 | -20.070                              | 1701.047                   | -34.630                 |
| 35   | Severe AD           | Severe AD           | 0.000                   | 0.000         | 1.000      | 4.912  | -1.324 | 30.275                               | 1672.099                   | -32.677                 |
| 36   | Severe AD           | Severe AD           | 0.000                   | 0.000         | 1.000      | 5.058  | -0.886 | 20.423                               | 1559.858                   | -34.597                 |
